2 *Mms19* promotes spindle microtubule assembly in  
3 neural stem cells through two distinct pathways  
4

5  
6 **Rohan Chippalkatti<sup>ab</sup>, Boris Egger<sup>c</sup> and Beat Suter<sup>a</sup>**

7  
8 \*a: Institute of Cell Biology, University of Bern

9 \*b: Graduate School for Cellular and Biomedical Sciences, University of Bern

10 \*c: Department of Biology, University of Fribourg  
11  
12  
13  
14  
15  
16  
17  
18  
19  
20  
21  
22  
23  
24  
25  
26  
27  
28  
29  
30  
31  
32  
33

34 ***Running title:***

35 Spindle assembly by Mms19  
36

37 ***Key words:***

38 mitotic spindle, microtubule, Mms19, TACC, mitotic kinases, CAK complex  
39

40 **Abstract**

41

42

43 Mitotic divisions depend on the timely assembly and proper orientation of the mitotic spindle.

44 Malfunctioning of these processes can considerably delay mitosis, thereby compromising

45 tissue growth and homeostasis, and leading to chromosomal instability. Here we identified

46 *Mms19* as an important player in these processes as it promotes spindle and astral

47 microtubule (MT) growth and consequently regulates spindle orientation and mitosis

48 duration in *Drosophila* neural stem cells. Loss of functional *Mms19* drastically affects the

49 growth and development of mitotic tissues in *Drosophila* larvae. We found that *Mms19*

50 performs its mitotic activities through two different pathways. By stimulating the mitotic

51 kinase cascade, it triggers the localization of the MT regulatory complex TACC/Msps

52 (Transforming Acidic Coiled Coil/Minispindles, the homolog of human ch-TOG) to the

53 centrosome. In addition, we present evidence that *Mms19* stimulates MT stability and

54 bundling by binding directly to MTs.

55

## 56 Introduction

57

58 The fidelity of chromosome segregation during mitotic divisions depends on the proper  
59 regulation of the structure and dynamics of spindle microtubules. Numerous mitotic factors,  
60 including different mitotic kinases and microtubule (MT) associated proteins, meticulously  
61 regulate the formation, orientation, polymerization and catastrophe of spindle MTs to ensure  
62 that the chromatids are evenly delivered to the two products of the division process, the  
63 daughter cells. Incorrect regulation of Cdks and MTs can lead to chromosomal instability and  
64 to deleterious effects on the growth and development of somatic tissues.

65

66 *Mms19* was identified as a gene required for nucleotide excision repair (NER) (Prakash et al,  
67 1979). The protein Mms19 can be found as part of the Cytoplasmic Iron-Sulfur Assembly  
68 complex (CIA), which mediates the incorporation of iron-sulfur clusters into NER proteins such  
69 as Xpd (Gari et al, 2012; Stehling et al, 2012). However, a distinct, apparently DNA repair-  
70 independent, function of *Mms19* came to light when its knock-down caused numerous  
71 mitotic spindle abnormalities in human cells (Ito et al, 2010). Downregulation of *Mms19* in  
72 young *Drosophila* embryos also revealed spindle abnormalities and chromosome segregation  
73 defects, and these phenotypes were linked to the mitotic control pathway when results by  
74 Nag and co-workers revealed that Mms19 acts as a positive regulator of the Cdk Activating  
75 Kinase (CAK) activity (Nag et al, 2018). CAK has dual roles during the cell cycle where it  
76 activates the mitotic Cdk1 during mitosis, but is recruited by Xpd to form the holoTFIIH  
77 complex during interphase (Cameroni et al, 2010). The incorporation into TFIIH causes CAK to  
78 phosphorylate an entirely different set of substrates and allows CAK to perform its functions  
79 in transcription. Nag et al proposed that Mms19 binds to Xpd during mitosis and that this  
80 binding competes with the binding of Xpd to the TFIIH subunits. Binding to Xpd could thereby  
81 release CAK to activate its mitotic targets. In this model, reduced levels of Mms19 prevent  
82 the dissociation of the Xpd-CAK complex. As a consequence, the required levels of the mitotic  
83 CAK activity are not established. Indeed, overexpressing CAK complex components in the  
84 *Mms19* loss-of-function (*Mms19<sup>P</sup>*) background rescued the mitotic defects to a large degree  
85 (Nag et al, 2018).

86

87 The remarkable findings by Nag et al uncovered a novel mitotic pathway for *Mms19*. But this  
88 study mostly focused on the young *Drosophila* embryo which is unusual in that all somatic  
89 nuclei share a common cytoplasm in which the mitotic divisions take place. Furthermore,  
90 their cell cycle consists of only S and M phases, without intervening G phases. In this situation  
91 with the shared cytoplasm, the absence of *Mms19* often causes microtubules emanating from  
92 one spindle pole to contact the chromosomes of a neighboring nucleus. It is therefore difficult  
93 to extrapolate these findings to mononuclear diploid cells that are isolated from their  
94 neighbors by plasma membranes and have a full cell cycle. Furthermore, even though the  
95 spindle abnormalities observed in the absence of *Mms19* could be linked to compromised  
96 CAK activity, the pathway acting downstream of CAK is not clearly understood. Finally,  
97 overexpression of the CAK complex brought about only a partial rescue of the *Mms19<sup>P</sup>*  
98 defects, pointing towards additional, possibly CAK-independent spindle regulatory roles of  
99 *Mms19*.

100

101 The objective of this study was thus to investigate the mitotic function of *Mms19* in normal  
102 diploid cells with the goal of dissecting the precise pathway through which *Mms19* acts to  
103 regulate mitotic spindle assembly and cell cycle progression. Because *Mms19<sup>P</sup>* larvae lack  
104 imaginal discs, we chose the larval brain neuroblasts (NBs) as a model to analyze the mitotic  
105 roles of *Mms19* in cells with a full cycle. We identified several novel *Mms19* phenotypes,  
106 which allowed us to pinpoint steps in the pathways that require *Mms19* activity. We found  
107 that *Mms19* is required in NBs for timely progression through the cell cycle and consequently  
108 for establishing normal cell numbers in the NB lineage. *Mms19* is also required for the growth  
109 and assembly of spindle and astral microtubules (MTs). Our results connect these defects to  
110 the mis-localization of the microtubule regulator TACC, suggesting that TACC is a downstream  
111 target of the mitotic kinase cascade through CAK-Cdk1-Aurora kinases. Additionally, and  
112 apparently unrelated to the CAK-Cdk1 axis, we also identified a direct interaction *in vitro*  
113 between *Mms19* and microtubules and found that *Mms19* promotes microtubule stability  
114 and bundle formation.

115

116 **Results:**

117

118 ***Mms19<sup>P</sup>* brains show a microcephaly phenotype**

119 Normal *Drosophila* larvae spend on average 5-7 days at 25°C to pass through the larval stages.

120 In contrast, *Mms19<sup>P</sup>* larvae take not only at least 8-10 days to reach the size of outgrown WT

121 third instar larvae, but they also spend a total of around 15 days in the 3<sup>rd</sup> larval instar stage

122 before they die. These larvae display a typical mitotic phenotype without recognizable

123 imaginal disc tissues (Nag et al, 2018). Even though outgrown *Mms19<sup>P</sup>* larvae lack imaginal

124 discs, their brain is still present, although it is much smaller, displaying a microcephaly

125 phenotype (Fig 1A-C). Additionally, the optic lobe (OL) appears deformed or underdeveloped.

126 Compared to the wild type, the total volume of the *Mms19<sup>P</sup>* brains and the volumes of the

127 CBs and OLs, too, are drastically reduced (Fig 1E-G). Surprisingly, however, the number of

128 central brain (CB) NBs per brain lobe did not significantly change between the controls and

129 the *Mms19<sup>P</sup>* brains (Fig 1D). This implies that the *Mms19<sup>P</sup>* NBs have been properly determined

130 and are present, but probably divide slowly, thereby contributing fewer Ganglion Mother

131 Cells (GMCs) and neurons to the CB and resulting in reduced brain size. We expressed wild-

132 type *Mms19* fused to eGFP (*Mms19::eGFP*) under the control of the endogenous *Mms19*

133 promoter in the *Mms19<sup>P</sup>* background to test whether the observed phenotype was indeed

134 caused by reduced *Mms19* activity. *Mms19::eGFP* fully rescued the brain morphology, the

135 volumes of the whole brain lobe as well as the CB and OL sizes (Fig 1A-G). This not only

136 confirmed that the defects observed in the mutant are indeed due to the absence of *Mms19*

137 activity and not due to a second site mutation on this chromosome, it also showed that the

138 *Mms19::eGFP* fusion protein is functional.

139 A mitotic activity of *Mms19* was described to promote the Cdk-activating kinase activity of

140 the Cdk7/CycH/Mat1 complex (CAK complex; Nag et al, 2018). The responsible mechanism

141 appears to be a competitive binding of *Mms19* to Xpd, which would otherwise recruit CAK to

142 TFIIH, where it assumes a different substrate specificity and is unable to activate the M-Cdk

143 Cdk1. The key result that lead to this model was that the lack of imaginal discs caused by the

144 absence of *Mms19* activity could be rescued considerably by expressing the CAK complex

145 components under the control of the Upstream Activating Sequences (UAS) enhancer, using

146 the *daughterless(da)*-Gal4 driver in the *Mms19<sup>P</sup>* background (*da>CAK, Mms19<sup>P</sup>*) (Nag et al,

147 2018). We therefore tested whether it was possible to rescue the small brain phenotype by

148 the identical strategy. This was not the case, as both CBs and OLs remained smaller (Fig 1A-  
149 G). In *da>CAK*, *Mms19<sup>P</sup>* brains, the number of CB NBs was similar as in the wild type (Fig 1D),  
150 even though the overall brain volume was reduced. These observations indicated that the  
151 *Mms19<sup>P</sup>* CB NBs probably did not proliferate enough to produce the normal amount of  
152 neuronal tissue, and that this defect might not only be caused by insufficient CAK activity.  
153 This result therefore points to the possibility that Mms19 acts through two different pathways  
154 to achieve normal organ size.

155

### 156 **Higher fraction of *Mms19<sup>P</sup>* NBs in mitosis**

157 In order to better understand the microcephaly phenotype, we performed 5-Ethynyl-2'-  
158 deoxyuridine (EdU) incorporation assays coupled with pH3 staining and examined defects in  
159 cell cycle progression in the NBs. Based on pH3 and EdU staining, the cells can be allocated  
160 to one of the following phases: only EdU = S, i.e. cells in S phase; pH3 without EdU = M, i.e.  
161 cells undergoing mitosis; both EdU and pH3 = G2/M, i.e. cells transiting from S to G2/M phase;  
162 and neither EdU nor pH3 (= G1/G0, i.e. Gap phase) (Fig S1A). NBs were marked with  
163 antibodies against Miranda (Mira) and the number of cells were counted in each class. The  
164 results are represented as a percentage of the total number of cells per brain lobe. We  
165 observed that about half the cells were not labelled (i.e. G1/G0 cells: 47-56%; Fig S1B) and  
166 the relative differences between the genotypes were small. However, lack of *Mms19* caused  
167 a clear increase in the fraction of cells in M phase (35% compared to 24% in the wild type; Fig  
168 S1E). This result could either mean that more cells undergo divisions or that the *Mms19<sup>P</sup>* NBs  
169 are either trapped in M phase or proceed more slowly through it.

170 Interestingly, the small class of cells that are EdU<sup>+</sup> and pH3<sup>+</sup> showed the highest relative  
171 increase in frequency when CAK was overexpressed (Fig S1D; 6.5% vs 3.2% for *Mms19<sup>P</sup>*).  
172 Double positive cells have gone through S phase and were in M-phase at the time of fixation.  
173 The fact that overexpression of CAK leads to a higher frequency of double positive cells is  
174 consistent with the idea that these cells are progressing through the cell cycle more rapidly  
175 and/or that they enter M-phase prematurely.

176

177 **NBs depend on *Mms19* for timely and coordinated spindle assembly and spindle**  
178 **orientation**

179 To study how *Mms19* contributes to spindle assembly and progression through mitosis, we  
180 utilized a transgene that expresses EB1::GFP, a MT plus end binding and tracking protein that  
181 labels growing MT ends (Zhu et al, 2009). Live imaging of NBs expressing EB1::GFP revealed  
182 the dynamics of the formation of the mitotic spindle and allowed us to estimate the duration  
183 of mitosis, which we defined as the period from the onset of the Nuclear Envelope Break-  
184 Down (NEBD) until the end of cytokinesis. NEBD onset was determined by the appearance of  
185 the GFP signal in the nuclear region, which lacks a GFP signal until NEBD. NBs expressing  
186 EB1::GFP in the wild-type background finished cytokinesis approximately 10 min after NEBD  
187 (Fig 2A, mov 01). On the other hand, NBs expressing EB1::GFP in an *Mms19<sup>P</sup>* background  
188 reached cytokinesis only around 20 min after NEBD (Fig 2B, mov 02).

189 Interestingly, in some of the EB1::GFP expressing *Mms19<sup>P</sup>* NBs, the spindle formation started  
190 before the two centrosomes had finished migrating to the opposite sides of the nucleus (Fig  
191 2B, mov 03). As a result, at 3 min, a kinked spindle was observed, which eventually  
192 straightened out at 5 mins. Around 10% kinked spindles were found in *Mms19<sup>P</sup>* NBs. In one  
193 case of a *Mms19<sup>P</sup>* NB spindle, only one centrosome started nucleating MTs (Fig 2C). The  
194 spindle remained monopolar until 6 min post NEBD and only then, a bipolar spindle became  
195 apparent. Further, around 20% of the spindles in *Mms19<sup>P</sup>* NBs changed their orientation  
196 during the course of mitosis (Fig 2B, B', mov 03), while all wild type spindles examined  
197 remained firmly anchored at the cortex and did not change their orientation (Fig 2A, A').

198 *Drosophila* larval NBs are characterized by a defined apical-basal polarity (Homem et al, 2012)  
199 where the atypical Protein Kinase C (aPKC)-Bazooka-Pins complex localizes to the apical  
200 cortex while Miranda localizes to the basal cortex (Fig S4A). As differentiation of the GMC  
201 relies on the inheritance of the Mira-bound cargo, the orientation of the mitotic spindle is  
202 tightly coupled to this apical basal polarity axis (Schuldt et al, 1998; Rolls et al, 2003). We  
203 therefore further examined the spindle orientation defects in fixed cells labelled with the  
204 polarity marker Miranda (Mira), which localizes to the basal cortex of the NB, forming a  
205 crescent-like pattern. We found that most of the WT spindles form at an angle of 10 degrees  
206 or lower relative to Mira. On the other hand, *Mms19<sup>P</sup>* NBs more frequently failed to align  
207 their spindles within 10 degrees (Fig S4C-D) and the largest tilt that we observed was around  
208 60°. However, a marked effect on cell fate determination was observed previously only when

209 the spindle angle was close to 90° (Lee et al, 2006; Cabernard and Doe, 2009). In this case  
210 spindles oriented at around 90° led to both the daughter cells assuming the NB identity, thus  
211 increasing NB numbers per brain lobe. Consistent with this spindle orientation defect being  
212 insufficient to cause major NB amplification, we did not see a significant difference in the NB  
213 number per brain lobe between wild-type *Mms19<sup>P</sup>* (Fig 1D). Therefore, the spindle orientation  
214 defect due to lack of *Mms19* does not appear to lead to differentiation problems, but impedes  
215 efficient mitosis.

216 We conclude that in the absence of *Mms19*, spindle formation is not properly coordinated  
217 with cell cycle progression and that defects in centrosome migration and in spindle assembly  
218 and orientation contribute to the delay of the mitosis in *Mms19<sup>P</sup>* NBs.

219

### 220 ***Mms19* is cell autonomously required to maintain normal cell numbers**

221 In the experiments with the *Mms19<sup>P</sup>* mutants, *Mms19* was absent from all larval cells. In this  
222 situation, the mitotic delay could be due to a systemic effect or due to the lack of a cell  
223 autonomous activity of *Mms19*. To test whether *Mms19* is specifically required in the mitotic  
224 cells for the timely progression through mitosis, we generated *Mms19<sup>P</sup>* mosaic NB clones in  
225 an otherwise wild-type background. Mosaic clones were induced in NBs 24hrs after larval  
226 hatching (ALH) and the expansion of these clones was analyzed by dissecting the brains in  
227 mid-third instar larvae 72 hrs ALH. For this experiment, we focused on the type I NBs on the  
228 ventral side. On average, 45 cells per clone were counted in control clones, but only around  
229 30-35 cells in *Mms19<sup>P</sup>* clones ( $P < 0.05$ ; Fig S2 A-C), indicating that the loss of *Mms19* activity  
230 hinders the establishment of normal cell numbers in the NB lineage. This observation  
231 reaffirms our conclusion that absence of *Mms19* delays mitosis in NBs and that this mitotic  
232 delay probably causes more *Mms19<sup>P</sup>* NBs to linger in M-phase (Fig S1E).

233

234

### 235 ***Mms19* is required to form spindles of a normal length and density**

236 *Mms19<sup>P</sup>* spindles are generally shorter than the wild-type ones (Fig 3A-E). In normal NB  
237 spindles, the centrosomes were anchored close to the cell cortex, with spindle MTs  
238 emanating from them and extending to the chromosomes (Fig 3A, A'). But in around a quarter  
239 of the mutant cells, even though the chromosomes were aligned at the metaphase plate, the  
240 centrosomes were connected to the cell cortex and were only a short distance away from the



241 metaphase plate (Fig 3B, B'). In order to quantify this defect, we measured the length of the  
242 spindles across all genotypes and found that the spindles in *Mms19<sup>P</sup>* and *da>CAK, Mms19<sup>P</sup>*  
243 were significantly shorter than the wild-type control spindles (Fig 3C). As the NBs were also  
244 considerably smaller in *Mms19<sup>P</sup>* and *da>CAK, Mms19<sup>P</sup>* brains (Fig 3D), we additionally  
245 displayed the spindle length relative to the cell diameter (Fig 3E). A ratio closer to 1 indicates  
246 that the centrosomes were anchored close to the cell cortex, as in a healthy spindle. On the  
247 other hand, if the ratio was equal to or lower than 0.6, the spindle was defined as a 'short  
248 spindle' because the centrosomes were further inside the cell. We found a significant  
249 reduction in this ratio in *Mms19<sup>P</sup>* and *da>CAK, Mms19<sup>P</sup>* NB spindles (Fig 3E). *Mms19<sup>P</sup>* NBs  
250 contained around 20% short spindles while this number went up to 30% for *da>CAK, Mms19<sup>P</sup>*  
251 (Fig 3F). This data indicates that the short spindle phenotype was not rescued, but actually  
252 worsened upon overexpression of CAK. On the other hand, expression of *Mms19::eGFP* in the  
253 *Mms19<sup>P</sup>* background rescued the short spindle phenotype and only 3% of the NBs displayed  
254 it.

255 To determine the effect of *Mms19* on MT formation and stability, we measured astral as well  
256 as inner spindle MT density. For astral MT quantification, we used the method described by  
257 Yang and co-workers (Yang et al, 2014; Fig 3G) and found a significant reduction in the  
258 *Mms19<sup>P</sup>* NBs as compared to wild type (Fig 3H-I). This phenotype appeared to be slightly  
259 rescued by CAK complex overexpression and was fully rescued by expressing *Mms19::eGFP*  
260 in the *Mms19<sup>P</sup>* background. Reduced astral MT stability could be linked to the spindle  
261 positioning and orientation defects described previously (Fig 2B, 2E, S4B-D) as astral MTs  
262 were shown to contact the cell cortex and regulate spindle positioning (Pearson et al, 2004).  
263 *Mms19* is thus necessary for the formation of fully assembled spindles and astral MTs.

264  
265

### 266 ***Mms19* assists MT polymerization *in vivo***

267 To assess whether the short spindles could result from a defect in MT growth *in vivo*, we  
268 studied NBs expressing *EB1::GFP*. Live imaging of *EB1::GFP* revealed the path of elongation of  
269 single MTs, akin to that of a comet, and the movement speed of the GFP signal reflects the  
270 growth speed of the MT plus ends. Wild-type and *Mms19<sup>P</sup>* larval brains expressing *EB1::GFP*  
271 were dissected and live imaging was performed. The speed of the *EB1::GFP* particles was then  
272 tracked manually using ImageJ. The measurements indicated that the spindle MTs of wild-

273 type NBs polymerized at a rate that is significantly higher than the rate observed in *Mms19<sup>P</sup>*  
274 NBs (Fig 4A, A', WT-mov 04, *Mms19<sup>P</sup>* -mov 05). To assess whether the MT assembly function  
275 of *Mms19* is restricted to the mitotic state, we also tested whether the absence of *Mms19*  
276 also affects MT polymerization in the post mitotic glia cells. Measuring EB1 comet speeds in  
277 glia cells showed a decrease in MT growth for *Mms19<sup>P</sup>* glia as compared to wild-type glia (Fig  
278 4B, B', WT-mov 06, *Mms19<sup>P</sup>* -mov 07). These results established that *Mms19* assists MT  
279 polymerization and growth *in vivo* in mitotic NBs and in postmitotic glia.

280 Perhaps due to reduced MT growth, spindle assembly is also delayed in *Mms19<sup>P</sup>* brain NBs.  
281 Approximately 3 minutes after the onset of NEBD, a spindle fully assembled in wild-type NBs  
282 (Fig 4C). In contrast, in most *Mms19<sup>P</sup>* NBs, 3 minutes after the onset of NEBD the 'spindles'  
283 appear to be short and MT density seems much lower than in the wild type (Fig 4D). In the  
284 presented case, it took 7 minutes from the start of NEBD until a fully assembled spindle  
285 became visible (Fig 4D).

#### 286 287 ***Mms19* is required for spindle re-polymerization**

288 The short spindles observed in *Mms19<sup>P</sup>* NBs might be caused by impaired MT polymerization.  
289 To test whether *Mms19* modulates MT polymerization dynamics, we utilized the *in vivo* MT  
290 polymerization assay described by Gallaud and co-workers (Gallaud et al, 2014). With this  
291 procedure, the NB spindles were completely depolymerized after incubation on ice for 30 min  
292 (Fig 5A). Wild-type NB spindles then regained their standard size and morphology within 90  
293 sec after shifting them back to 25°C (Fig 5A). In *Mms19<sup>P</sup>* NBs, however, the spindles failed to  
294 re-polymerize to the normal shape after 90 sec. Instead, they remained abnormally short (Figs  
295 5B, 5E). Interestingly, whereas the *Mms19::eGFP* fusion protein was able to rescue this  
296 phenotype, CAK overexpression was unable to do so (Fig 5C-E). To validate this short spindle  
297 phenotype, we also calculated the spindle sizes relative to the cell diameter after 90 sec  
298 incubation at 25°C (Fig 5F). Even though *Mms19<sup>P</sup>* cells are smaller, their normalized spindle  
299 size was still significantly smaller than the wild-type one. When CAK was overexpressed in  
300 *Mms19<sup>P</sup>* NBs, the spindle became slightly longer than in *Mms19<sup>P</sup>*, but it still remained shorter  
301 than in the *Mms19<sup>P</sup>* mutant rescued with the wild-type *Mms19::eGFP* transgene (Fig 5F). This  
302 result shows that *Mms19* has an important role in promoting spindle polymerization and  
303 mainly through a CAK independent process.

304

### 305 **Centrosomal localization of the MT regulator TACC depends on *Mms19***

306 Transforming Acidic Coiled-Coil (TACC), a downstream target of Aurora A kinase, is a critical  
307 regulator of centrosomal MTs. During mitosis, Aurora A phosphorylates TACC and stimulates  
308 its localization on the centrosomes, where TACC further recruits mini-spindles (Msps). Loss-  
309 of-function mutations in either *Aurora A*, *TACC* or *Msps* show drastic abnormalities in astral  
310 and spindle MTs (Giet et al, 2002; Bird and Hyman, 2008). As *Mms19<sup>P</sup>* NBs display defects in  
311 centrosomal separation, spindle length and astral MTs, we examined whether Aurora A and  
312 TACC might be involved in the same process as *Mms19* and if the absence of functional  
313 *Mms19* impedes *TACC* function. We therefore stained wild-type and *Mms19<sup>P</sup>* NBs for TACC  
314 and observed a strong signal at the wild-type centrosomes (Fig 6A). On the other hand, in  
315 >50% of *Mms19<sup>P</sup>* NBs, TACC did not show any enrichment on the centrosomes (Fig 6B, D).  
316 Similar results were also obtained with its interactor Msps (Fig S6). As TACC acts downstream  
317 of Aurora A kinase, and Aurora itself acts downstream of Cdk1 (Van Horn et al, 2010), this  
318 defect might be caused by insufficient CAK activity in *Mms19* mutants (Nag et al, 2018). We  
319 therefore tested this hypothesis by over-expressing the three CAK components in the *Mms19<sup>P</sup>*  
320 background (*da>CAK, Mms19<sup>P</sup>*). Indeed, upon CAK overexpression, the fraction of spindles  
321 displaying centrosomal TACC almost reached wild-type levels (Fig 6C, D). To quantify the  
322 enrichment of TACC on centrosomes, we compared the fluorescent intensity of centrosomal  
323 TACC to the TACC fluorescent intensity on the spindle. This ratio decreased for *Mms19<sup>P</sup>* NBs,  
324 but was rescued in *da>CAK, Mms19<sup>P</sup>* NBs (Fig 6E). It was also reported that *Aurora A* loss-of-  
325 function can cause centrosome fragmentation (Giet et al, 2002). Co-staining *Mms19<sup>P</sup>* NBs with  
326 antibodies against the centrosomal protein  $\gamma$ -Tubulin showed that even in cases with  
327 apparent TACC mis-localization, centrosomal  $\gamma$ -Tubulin was still present, indicating that TACC  
328 mislocalization is not caused by centrosome fragmentation. These findings indicate that  
329 centrosomal localization of TACC and its stimulation of astral and spindle MT stability or  
330 growth is at least partially dependent on *Mms19* activity.

331

### 332 ***Mms19* binds to MTs and stimulates MT assembly**

333 To explore the possibility that *Mms19* also functions through different activities, we prepared  
334 protein extracts from flies expressing *Mms19::eGFP* driven by its endogenous promoter (Nag  
335 et al, 2018), subjected them to immunoprecipitations and analyzed co-purifying proteins by

336 Mass spectrometry (Supplementary Table S1). Adult wild-type flies and Imp::eGFP expressing  
337 flies, respectively, served as controls to exclude any non-specific binding to beads and GFP,  
338 respectively. Amongst the proteins exclusively bound to Mms19::eGFP were the CIA proteins  
339 Mip18, Ciao1 and Ant2, which form a complex with Mms19 to mediate Fe-S cluster delivery  
340 (Gari et al, 2012; Stehling et al, 2012). The fact that we recovered these proteins efficiently,  
341 indicated that the purification was efficient. Because *Mms19* functions on microtubules and  
342 our second control, IMP::eGFP, is also involved in MT dependent processes, we additionally  
343 inspected the data for tubulin and MT binding proteins that are enriched by the Mms19::eGFP  
344 compared to the wild-type control without eGFP tag (Supplementary Table S2). This  
345 comparison revealed a clear enrichment of tubulin and several Microtubule Associated  
346 Proteins (MAPs). Some of the associated proteins were not present at all in the wild-type  
347 control, some were present, but at lower levels compared to the Mms19::eGFP and  
348 IMP::eGFP fractions. Others were exclusively found in the Mms19::eGFP fraction. These  
349 results therefore suggested that Mms19 might directly or indirectly bind to MTs.

350 To validate the interaction of Mms19 with Tubulin, we next tested whether Mms19::5xHis  
351 purified from *E. coli* and  $\alpha/\beta$ -tubulin dimers interact *in vitro*. Mms19::5xHis was incubated at  
352 an equimolar ratio with purified porcine brain  $\alpha/\beta$ -tubulin and then bound to the Ni-NTA  
353 resin. All incubations and washing steps were carried out at 4°C. Copurifying proteins were  
354 then assessed by western blotting. A band corresponding to  $\alpha$ -tubulin was observed when  
355 tubulin was incubated with Mms19::5xHis (Fig 7A, B), but tubulin alone did not bind to the  
356 resin, pointing to a direct interaction between tubulin and Mms19::5xHis.

357 To establish whether Mms19 stimulates MT polymerization, assembly or stability, we  
358 performed a spectrophotometric assay in which tubulin was incubated with Mms19::5xHis at  
359 a 40:1 ratio (Mirigian et al, 2013). The absorbance of this mixture was recorded at 340nm  
360 over 40 min. The increase in absorbance of the sample is a measure for the polymerization of  
361 MTs. The positive control, a fraction of known MT elongators (Microtubule Associated Protein  
362 Rich Fraction (MAPF) produced a similar maximal absorbance (Fig 7C), but this was not seen  
363 when either only Mms19 or only tubulin were added (Fig 7C). Furthermore, to distinguish MT  
364 polymerization from aggregation, we incubated this mixture after the polymerization at 4°C.  
365 If tubulin indeed polymerizes into MTs, this incubation in the cold should de-polymerize the  
366 MTs. On the other hand, if the increasing absorbance was due to aggregation of either tubulin

367 or Mms19, the absorbance due to aggregates would not decrease after cold treatment.  
368 Because the absorbance of the sample sharply decreased in the cold, we conclude that  
369 Mms19 indeed promoted MT polymerization (Fig 7D-D'). Mms19 thus not only binds to  
370 tubulin and MTs, it also stimulates MT polymerization, assembly or stability *in vitro*.

371 To better understand the mechanism of modulation of the MT dynamics by Mms19, we  
372 complemented the biochemical experiments with a high-resolution optical method.  
373 Polymerized MTs were incubated at room temperature (RT) with either BRB80/solvent buffer  
374 or with Mms19::5xHis, purified upon expression in *E. coli*. These samples were then visualized  
375 by negative-stain electron microscopy (EM). MT fibers in general appeared to be less stable  
376 upon addition of BRB80/solvent alone (at RT) as some MT fibers were observed undergoing  
377 de-polymerization (Fig 7E) under these conditions. Remarkably, MTs incubated with  
378 Mms19::5xHis were comparatively longer (Fig 7F, G) and more bundled (Fig 7H, I).  
379 Furthermore, the Mms19::5xHis containing samples contained particles not found in the  
380 samples without Mms19 and these particles appeared along the lateral MT surface (Fig 7F,  
381 H). It thus appears that Mms19 binds along the surface of MTs, stabilizing MTs and possibly  
382 stimulating inter-MT contacts.

383

384 **Discussion:**

385

386 *Mms19* was initially identified as a gene that regulates the nucleotide excision repair (NER)  
387 pathway of DNA repair through its participation in Fe-S cluster assembly. When evidence  
388 emerged about a possible NER independent mitotic activity of *Mms19* (Ito et al, 2010; Nag et  
389 al, 2018), this warranted further investigation into the precise role of *Mms19* during mitotic  
390 spindle assembly in diploid cells. Now we report novel, important roles for *Mms19* during  
391 spindle MT assembly and mitotic timing in *Drosophila* NBs. Based on their different  
392 suppressibility by elevated CAK levels, *Mms19* phenotypes point to a dual role of the novel  
393 mitotic gene *Mms19* in MT assembly. The direct function of *Mms19* in binding to, stabilizing  
394 and bundling of MTs seems CAK independent and might therefore have an important function  
395 in the establishment of other extended microtubule structures, too. Indeed, we found  
396 preliminary evidence that this might be the case. Neurites are long projections that emerge  
397 in differentiating, postmitotic neurons. They become packed with extended MT bundles  
398 which support neurite outgrowth and neuronal signaling. Because these are postmitotic  
399 events, this MT formation is not driven by the mitotic kinases. Nevertheless, we found that  
400 normal neurite outgrowth depended on *Mms19* because *Mms19<sup>P</sup>* neuronal cells were unable  
401 to extend neurites in *ex vivo* experiments (Fig S8).

402 In mitotic NBs, both *Mms19* mechanisms, the CAK independent and the CAK dependent, are  
403 required. Nag et al. (2018) had presented a model that explained how *Mms19* activates the  
404 mitotic CAK and the Cdk1 activity. Their model was based on results with larval imaginal discs.  
405 We reaffirmed that this *Mms19* activity is also important in NBs, and we further identified a  
406 downstream component of this *Mms19*-CAK-Cdk1 mitotic axis, that seems to mediate this  
407 activity, the regulator of centrosomal MTs, TACC. In the CAK dependent pathway model (Fig  
408 S3A-B), *Mms19* competes with the CAK complex for binding to Xpd (Ito et al, 2010; Nag et al,  
409 2018). During mitosis, binding of *Mms19* to Xpd prevents the interaction between Xpd and  
410 the CAK complex, thus releasing the inhibition of the Cdk-activating kinase activity of CAK by  
411 Xpd (Chen et al, 2003; Nag et al, 2018). Our results add an additional dimension to this  
412 pathway by linking it to the downstream Aurora A-TACC pathway (Giet et al, 2002; Barros et  
413 al, 2005). *Mms19* inactivation prevents normal centrosome localization of TACC and this  
414 phenotype is rescued upon expressing additional CAK (Fig 6). Cdk1, the major downstream  
415 target of the CAK complex, is known to activate Aurora A kinase during mitosis (Van Horn et

416 al, 2010) and phosphorylation of TACC by Aurora A triggers its centrosomal localization (Giet  
417 et al, 2002). Given that the failure of TACC localization in the absence of *Mms19* can be  
418 rescued by CAK over-expression, we now propose TACC as a downstream target of the  
419 *Mms19*-CAK-Cdk1 axis and modulation of CAK activity seems to be the main mode of action  
420 of *Mms19* towards TACC. The best characterized function of TACC is its interaction with Msps  
421 which leads to stabilization of astral MTs (Lee et al, 2001). This activity involves their  
422 recruitment to the centrosomes, and we found that not only the centrosomal localization of  
423 TACC (Fig 6), but also the one of Msps depends on *Mms19* and elevated CAK activity (Fig S6).  
424 The activity of *Mms19* through this pathway, which involves the activation of the M-phase  
425 regulator Cdk1, therefore contributes significantly to the coordination of cell cycle  
426 progression and spindle formation, a process that is affected in the absence of *Mms19* (Fig  
427 2).

428 Loss of centrosomal TACC or Msps leads to destabilization of centrosomal MTs and defects in  
429 chromosome segregation (Gergely et al, 2000; Lee et al, 2001), indicating that the activity of  
430 *Mms19* through this pathway makes an important contribution to MT stability and  
431 chromosomal segregation. Interestingly, whereas TACC itself may not directly regulate MT  
432 assembly, there is good evidence that its partner Msps, which also requires *Mms19* function  
433 to localize to centrosomes (Fig S6), can promote MT polymerization. The *Xenopus* homologue  
434 of Msps, XMAP215, and the mammalian homolog, chTOG, have been demonstrated to be  
435 processive MT polymerases (Brouhard et al, 2008; Gutierrez-Caballero et al, 2015).

436 CAK overexpression rescued TACC localization, but it could not fully rescue the short  
437 spindle/spindle assembly and the microcephaly defects (Figures 1, 3, 5). Furthermore, even if  
438 we did not test this directly, we can expect the glial cell MT growth defects (Fig 4B) and the  
439 neurite outgrowth defect (Fig S8) to be also independent of the CAK activity because this  
440 kinase is mostly active during the mitotic phase of the cell cycle. We found that *Mms19*  
441 interacts directly with tubulin and MTs. This is interesting because previous work had also  
442 suggested an interaction with the mitotic spindle (Ito et al, 2010, van Wietmarschen et al,  
443 2012, Nag et al, 2018). In this study, we report for the first time a direct interaction between  
444 *Mms19* and tubulin, and we linked this interaction to an activity of *Mms19* in stimulating MT  
445 assembly (Fig 7). The EM data indicates that *Mms19* might contribute to the assembly of MTs  
446 by directly binding to them, bundling them and regulating thereby the stability of MTs.

447 Interestingly, such a MT bundling activity seems also crucial for neurite outgrowth, because  
448 the initial stage of this process involves bundling of MTs (Miller and Suter, 2018). This would  
449 explain why this process is delayed or blocked in most *Mms19<sup>P</sup>* neurons (Fig S8).

450 Recently, another connection between Fe-S cluster proteins and mitosis was described to  
451 involve Kif4a in HEK293 cells (Ben-Shimon et al, 2018). However, its *Drosophila* homologue,  
452 Klp3a, was not amongst the proteins co-purifying with Mms19::eGFP in extracts from adult  
453 flies (Table S1) and the *Klp3a* phenotypes described by (Williams et al, 1995) are distinctly  
454 different from the ones we found for *Mms19<sup>P</sup>*. Nevertheless, it would be interesting to find  
455 out whether and where *Mms19* has yet another mitotic function in a metazoan through  
456 delivering an Fe-S cluster to Klp3a/Kif4a.

457 Ito and co-workers first proposed the novel 'MMXD' mitotic complex consisting of Mms19,  
458 Mip18 and Xpd, that localizes to the mitotic spindle and is required for proper chromosome  
459 segregation in human cells (Ito et al, 2010). Interestingly, the epithelial-cell polarity regulator  
460 protein Crumbs (Crb) was also shown to form a complex called 'CGX' with Xpd and the  
461 *Drosophila* homolog of Mip18, Galla-2 (Yeom et al, 2014). Yeom and colleagues found that  
462 Crb and Galla-2 associated with the mitotic spindle and were required for spindle assembly  
463 and chromosome segregation in young *Drosophila* embryos and that this function could be  
464 connected with the modulation of CAK activity by Xpd (Li et al, 2010). Further, a tissue  
465 overgrowth phenotype induced by Crb overexpression was rescued by downregulation of Xpd  
466 and/or Galla-2. However, the authors did not describe a Crb-Mms19 interaction and Crb did  
467 not appear as a Mms19-interacting protein in our Mass-spectrometry screen. Nevertheless,  
468 as Mms19 interacts with both Xpd and Galla-2 (Nag et al, 2018), it seems likely that it could  
469 be a part of the mitotic 'CGX' complex. It would thus be interesting to test whether *Mms19*  
470 knockdown can also rescue the defects induced by Crb overexpression. Additionally, because  
471 neither of the 'CGX' proteins are known to have tubulin binding properties, the possibility  
472 exists that Mms19 might recruit the CGX/MMXD proteins to the spindles and co-ordinate  
473 spindle assembly and chromosome segregation with them.

474 Multiple MT associated proteins co-operate for the assembly and dynamics of the mitotic  
475 spindle. Our *in vitro* studies with *E.coli* expressed Mms19 strongly suggest that Mms19  
476 directly interacts with MTs and that this interaction supports MT growth and bundling. It is  
477 possible that *in vivo*, interaction of Mms19 with additional factors might then boost this



478 activity. Correspondingly, in the Mass Spectrometry analysis (Supplementary table 1) we also  
479 see MT associated proteins such as Lis-1, Kinesin heavy and light chains. Lis-1 is already known  
480 to function during spindle assembly and positioning (Moon et al, 2014). The  
481 immunopurification of Mms19 and associated proteins was carried out with extracts from  
482 total adult flies, where mitotic cells and particularly cells in M-phase are rare. It is therefore  
483 possible that our screen for interactions with Mms19 identified primarily proteins that  
484 interact in interphase and that we missed M-phase-specific interactions. Such candidates  
485 could be members of the kinesin family, like Kinesin-14 and Kinesin-5, that play important  
486 roles during mitosis. For instance, Kinesin-5 drives bipolar spindle assembly by cross-linking  
487 and sliding anti-parallel MTs and may also have an additional MT polymerase activity (Fink et  
488 al, 2007; Ferenz et al, 2010; Chen and Hancock, 2015; Leary et al. 2019). There is thus an  
489 exciting possibility that Mms19 may also bind to other spindle specific MAPs and through its  
490 MT modulatory activity serve to assist the function of such MAPs. Further evidence in this  
491 direction would reveal invaluable aspects about a possible cross-talk between Mms19 and  
492 MAPs.

493 It was shown recently that MMS19 protein levels are regulated by ubiquitination and  
494 subsequent proteasomal degradation in human cells by the ubiquitin ligase MAGE-F1 (Weon  
495 et al, 2018). Weon and colleagues showed that the human MMS19 is ubiquitinated at the C-  
496 terminal Lysine 993. Alignment of the human and *Drosophila* Mms19 sequences revealed  
497 that the human Lys 993 is conserved in *Drosophila* and, additionally, the PTM code 2 software  
498 identified this region in *Drosophila* Mms19 as a potential ubiquitylation site (Minguez et al,  
499 2012, Fig S7). This regulatory mechanism also links MMS19 to certain cancers, especially lung  
500 squamous cell carcinomas, where MAGE-F1 was found to be upregulated (Weon et al, 2018).  
501 In these tumor cells, up-regulation of MAGE-F1 correlated with increased mutational load and  
502 the authors connected these mutations to compromised DNA repair that might lead to  
503 chromosomal instability (CIN) due to excessive degradation of MMS19 by MAGE-F1. In  
504 support of this view, knock-down of MAGE-F1 considerably slowed tumor growth in a mouse  
505 xenograft model. But results from our study as well as previous reports (Ito et al, 2010; Nag  
506 et al, 2018) provide strong evidence for the roles of Mms19 in MT assembly and spindle  
507 formation and its misfunction in this process could cause CIN, leading to the mutational  
508 burden. The mitotic defects we observed upon loss of functional *Mms19* did not lead to high

509 levels of aneuploidy in otherwise healthy NBs (Fig S5). However, in rapidly dividing tumor cells  
510 carrying oncogenic driver mutations (and lacking tumor suppressor or mitotic checkpoint  
511 functions), spindle defects caused by loss of *MMS19* function could possibly amplify the DNA  
512 damage effects and CIN. Indeed, high levels of aneuploidy were observed in human HCT116  
513 cell lines and in *Drosophila* syncytial embryos with reduced *Mms19* function (Ito et al, 2010;  
514 Nag et al, 2018). Our results, therefore, provide support for the interpretation that this novel  
515 spindle assembly function of *Mms19* might play an important role in preventing CIN and  
516 tumor formation in rapidly dividing cells.

517 Our findings have uncovered novel insights about the mechanism of spindle assembly by  
518 *Mms19*. Moreover, as these activities involve a direct association of Mms19 with either Xpd  
519 or MTs, the functions described here are most likely independent of the NER role of Mms19.  
520 We have also found evidence for a possibly non-mitotic MT regulatory role of *Mms19* for  
521 neurite outgrowth. It will be interesting to further analyze the function of Mms19 during the  
522 various stages of neurite outgrowth and how its expression and localization is regulated in  
523 neurons. A gene that was initially described as a NER regulator, *Mms19* now has the additional  
524 roles as a mitotic gene and a MT regulator assigned to it. For the critical roles it fulfils, the  
525 proper control of Mms19 expression and localization must be crucial, and erroneous  
526 activation of CAK or MT assembly are likely to lead to defects in cell cycle progression. Future  
527 studies should therefore address the transcriptional and post-translational control of Mms19  
528 expression and localization and how this impacts its functions in cell physiology, development  
529 and diseases.

530

531 **Materials and Methods**

532

533 **Key resources tables**

534

535 **The following table lists the fly stocks used in this study:**

| <b>Fly stocks</b>                                                                        |                                                                                   |                                 |
|------------------------------------------------------------------------------------------|-----------------------------------------------------------------------------------|---------------------------------|
| <b>Reagent</b>                                                                           | <b>Description</b>                                                                | <b>Source</b>                   |
| <i>P{EPgy2}Mms19EY00797/TM3, Sb1 Ser1 (Mms19<sup>P</sup>)</i>                            | P-element insertion in the third exon of <i>Mms19</i>                             | Bloomington stock center #15477 |
| <i>+</i> ; <i>Mms19::eGFP, Mms19<sup>P</sup></i>                                         | eGFP-tagged <i>Mms19</i> protein expressed in <i>Mms19<sup>P</sup></i> background | own work (Nag et al, 2018)      |
| <i>+</i> ; <i>EB1::GFP/CyO</i>                                                           | GFP-tagged EB1 protein expressed under the poly-ubiquitin promoter                | provided by Regis Giet          |
| <i>+</i> ; <i>EB1::GFP/CyO; Mms19<sup>P</sup>/Tm6, Tb</i>                                | <i>EB1::GFP</i> expressed in the <i>Mms19<sup>P</sup></i> background              | generated in this study         |
| <i>hs-flp/hs-flp; tub-Gal4, UAS-mCD8::GFP/CyO, actin::GFP; FRT82B, tub-Gal80/TM6, Tb</i> | MARCM driver stock                                                                | provided by Bruno Bello         |
| <i>+</i> ; <i>FRT82B, Mms19<sup>P</sup>/TM6, Tb</i>                                      | <i>FRT82B</i> recombined with <i>Mms19<sup>P</sup></i>                            | own work (Nag et al, 2018)      |
| <i>da-Gal4/CyO, mCherry; UAST-Mat1, Mms19<sup>P</sup>/TM3, Ser, GFP</i>                  | Stock for overexpression of CAK in the <i>Mms19<sup>P</sup></i> background        | own work (Nag et al, 2018)      |
| <i>UAST-Cdk7/CyO, mCherry/ UAST-CyclinH, Mms19<sup>P</sup>/TM3, Ser, GFP</i>             | Stock for overexpression of CAK in the <i>Mms19<sup>P</sup></i> background        | own work (Nag et al, 2018)      |

536

537

538 The following table lists the primary and secondary antibodies used for immunostainings:

| <b>Primary antibodies</b>      |                             |                       |                 |
|--------------------------------|-----------------------------|-----------------------|-----------------|
| <b>Antibody</b>                | <b>Manufacturer</b>         | <b>Catalog number</b> | <b>Dilution</b> |
| Rat anti-Miranda               | Abcam                       | Ab197788              | 1:250           |
| Rabbit anti-alpha Tubulin      | Abcam                       | Ab18251               | 1:500           |
| Mouse anti-alpha Tubulin       | Sigma                       | T6199                 | 1:500           |
| Rabbit anti-GFP                | Immunokontakt               | 210-PS-1GFP           | 1:500           |
| Rabbit anti-pH3                | Cell Signaling              | 9701                  | 1:200           |
| Rabbit anti-Mms19              | Genscript                   | Custom antibody       | 1:500           |
| Mouse anti- $\gamma$ H2av      | DSHB                        | UNC93-5.2.1           | 1:20            |
| Rabbit anti-PKC $\zeta$ (aPKC) | Santa-Cruz<br>Biotechnology | sc-216                | 1:2,000         |
| Mouse anti-Futsch              | DSHB                        | 22C10                 | 1:20            |
| Mouse anti- $\gamma$ Tubulin   | Sigma                       | T6557                 | 1:1,000         |
| Rabbit anti-TACC               | provided by Jordan Raff     | -                     | 1:1,000         |
| Rat anti-Elav                  | DSHB                        | 7E8A10                | 1:20            |
| Rabbit anti-Msps               | Provided by Hiro<br>Ohkura  | -                     | 1:1,000         |
| <b>Secondary antibodies</b>    |                             |                       |                 |
| Goat anti-rat Cy3              | Jackson Immuno              | 112-165-167           | 1:150           |
| Goat anti-mouse Alexa 488      | Invitrogen                  | R37120                | 1:500           |
| Goat anti-rabbit Alexa 488     | Invitrogen                  | A27034                | 1:500           |
| Goat anti-mouse Alexa 647      | Invitrogen                  | A21235                | 1:500           |

539

540 **The following table lists the antibodies used for probing western blots:**

| <b>Primary antibodies</b>    |                                  |                       |                 |
|------------------------------|----------------------------------|-----------------------|-----------------|
| <b>Antibody</b>              | <b>Manufacturer</b>              | <b>Catalog number</b> | <b>Dilution</b> |
| Rabbit anti-Mms19            | Synthesized by<br>Genscript Inc. | Custom antibody       | 1:2,000         |
| Rabbit anti-alpha<br>Tubulin | Abcam                            | Ab18251               | 1:2,000         |
| <b>Secondary antibodies</b>  |                                  |                       |                 |
| Goat anti-rabbit HRP         | Thermo Fischer<br>Scientific     | 65-6120               | 1:10,000        |

541

542 **Following table lists the kits and reagents used in this study:**

| <b>Reagent/Kit</b>                                           | <b>Manufacturer</b>          | <b>Catalog number</b> |
|--------------------------------------------------------------|------------------------------|-----------------------|
| Aqua Poly/Mount mounting medium                              | Polysciences Inc             | 18606-20              |
| Click-it EdU incorporation kit, Alexa Flour 647              | Thermo Fischer<br>Scientific | C10340                |
| Paclitaxel (Taxol)                                           | Sigma                        | T7402                 |
| Purified porcine Tubulin                                     | Cytoskeleton Inc             | T240-B                |
| MAPF (MT associated protein rich fraction from bovine brain) | Cyoskeleton Inc              | MAPF-A                |
| Schneider's Drosophila medium                                | ThermoFischer<br>Scientific  | 21720-024             |
| Hoechst 33342                                                | ThermoFischer<br>Scientific  | H3570                 |
| Protein G Mag Sepharose Xtra                                 | GE life sciences             | 28967066              |
| Ni-NTA agarose                                               | Qiagen                       | 30210                 |
| Collagenase I                                                | Sigma-Aldrich                | C0130-100MG           |
| Phenylmethylsulfonyl fluoride (PMSF)                         | Sigma-Aldrich                | 10837091001           |
| cOmplete™, Mini, EDTA-free Protease Inhibitor Cocktail       | Sigma-Aldrich                | 4693159001            |

|                                                                                                                                    |                                                               |                |
|------------------------------------------------------------------------------------------------------------------------------------|---------------------------------------------------------------|----------------|
| Concanavalin A                                                                                                                     | Sigma-Aldrich                                                 | C7898          |
| Formamide                                                                                                                          | Sigma-Aldrich                                                 | F9037-100ml    |
| Uranyl acetate                                                                                                                     | Electron microscopy sciences                                  | 22400          |
| 1,4-Piperazinediethanesulfonic acid, Piperazine-1,4-bis(2-ethanesulfonic acid), Piperazine-N,N'-bis(2-ethanesulfonic acid) (PIPES) | Sigma-Aldrich                                                 | P6757          |
| 5' Cy5 labeled Oligonucleotide probe: 5' Cy5-AACACAACACAACACAACACAACACAACACAACAC                                                   | Microsynth AG                                                 | ChrII          |
| Aphidicolin                                                                                                                        | Sigma-ALdrich                                                 | A0781          |
| <b>Software</b>                                                                                                                    |                                                               |                |
| <b>Software</b>                                                                                                                    | <b>Source</b>                                                 | <b>Version</b> |
| Fiji (ImageJ)                                                                                                                      | <a href="https://imagej.net/Fiji">https://imagej.net/Fiji</a> | -              |
| Leica Application Suite (LAS X)                                                                                                    | Leica microsystems                                            | -              |
| PRISM                                                                                                                              | Graph pad software                                            | Version 5      |

543

## 544 **Method Details**

545

### 546 **Dissection and immunostaining of larval brains**

547 Larval brains were dissected and stained as described (Daul et al, 2010). Briefly, wandering  
 548 third instar larvae were dissected in PBS and fixed for 15min in 4% paraformaldehyde  
 549 supplemented with 5mM MgCl<sub>2</sub> and 1mM EGTA (to stabilize MTs). After 3 washes in  
 550 PBS+0.1% TritonX-100 (PBST), primary antibodies were added. After overnight incubation, the  
 551 brains were washed 3x with PBST, stained with secondary antibodies and mounted on glass  
 552 slides in Aqua Polymount mounting medium (Polysciences).

553 For MT regrowth assays, brains were dissected in Schneider's medium (supplemented with  
 554 10% fetal bovine serum) at 25°C and incubated on ice for 30 min to depolymerize MTs. Brains  
 555 were then incubated for different time points in a 25°C water bath, followed by fixation and  
 556 immunostaining. This experiment was performed three times and 20 spindles were analyzed  
 557 in each iteration. Slides were imaged on a Leica TCS-SP8 microscope (Leica Microsystems)

558 equipped with a 63X, NA 1.4 Plan Aplanachromat objective. Images were acquired using LAS X  
559 software and analyzed using Fiji/ImageJ (Schindelin et al., 2012).

560

### 561 **Measuring brain compartment volumes**

562 Whole brain lobes were immunostained with antibodies against Miranda (Mira) and  
563 phospho-Histone 3 (pH3), and DNA was visualized with Hoechst 33342. Z stacks were acquired  
564 with a TCS-SP8 confocal microscope on a 63X, 1.4NA Plan-Aplanachromat objective with 1µm  
565 spacing between each optical section. Segmentation, volume measurement and 3D  
566 reconstruction was performed by using the TrackEM2 plugin in Fiji (Cardona et al, 2012).

567

### 568 **MARCM crosses**

569 For generating mosaic clones the driver stock *hs-flp; tub-Gal4, UAS-mCD8::GFP/CyO,*  
570 *actin::GFP; FRT82B, tub-Gal80/TM6, Tb* was crossed to *+*; *FRT82B, Mms19<sup>P</sup>/TM6, Tb*. GFP-  
571 Balancer negative 24hr old larvae were selected and heat shocked at 37°C in a glass vial  
572 submerged in a water bath for 15min. Larvae were then returned to 25°C and the brains of  
573 the non-Tubby larvae were dissected 48hrs later.

574

### 575 **Live imaging**

576 Brains expressing EB1::GFP were dissected and mounted on stainless steel chambers as  
577 described in (Cabernard et al, 2013). Brains were then imaged using a 100X, NA 1.3 oil  
578 immersion objective on a Visiscope Spinning disk microscope (Visitron GmbH) fitted with  
579 Nikon Ni2 stand and a Photometrics Evolve 512 EMCCD camera. Images were acquired for 60  
580 seconds at of 500ms time intervals at 200ms exposure at 60% laser power (488nm). To track  
581 the particle velocities, the particles were manually traced in Fiji/ImageJ (Schindelin et al.,  
582 2012). Probably due to limited resolution, it was not possible to unambiguously account for  
583 merging or splitting events and therefore only particles with a linear trajectory, which did  
584 neither split nor merge, were analyzed. At least 5 particles from each spindle were analyzed  
585 from a total of 11 cells per genotype. For surface glia quantification, at least 10 particles were  
586 analyzed from each of the 15 brains. Stacks were exported to .AVI movies at 14 frames per  
587 second.

588

589 To measure the duration of mitosis, EB1::GFP expressing brains were mounted as described  
590 above and imaged at 40% laser power with a 63X, 1.3 NA objective of a Nikon W1 LIPSI  
591 spinning disk microscope fitted with a Photometrics Prime 95B CMOS camera. Movies were  
592 acquired on Nikon's NIS elements software for 2hrs with an interval of 1 min at 200 ms  
593 exposure. Z-stacks were acquired simultaneously with 2 $\mu$ m distance between successive  
594 optical sections. Movies were analyzed and processed with Fiji/ImageJ. Stacks were exported  
595 to .AVI movies at 12 frames per second.

596

#### 597 **Quantification of spindle orientation:**

598 The orientation of the mitotic spindle was examined with respect to the basal Mira crescent.  
599 A reference line was drawn passing approximately through the center of the Mira crescent  
600 and the angle between the spindle and this reference line was determined using the ImageJ  
601 angle tool.

602

#### 603 **EdU incorporation**

604 Click-it EdU kit (Invitrogen) was used to measure EdU incorporation. Brains were dissected in  
605 PBS and incubated in Schneider's medium supplemented with 10 $\mu$ M 5-Ethynyl-2'-  
606 deoxyuridine (EdU) for 2hrs at 25°C. EdU is an analogue of Thymidine and is incorporated by  
607 S phase cells during DNA replication. EdU is then detected due to its binding to a dye-azide  
608 conjugate. Brains were subsequently fixed with 4% PFA and incubated with primary  
609 antibodies (anti-Mira to mark NBs and anti-pH3 to mark mitotic cells) and secondary  
610 antibodies. Subsequently, they were processed for EdU detection following the manufacturer  
611 instructions.

612

#### 613 **Preparation of whole-fly extract**

614 1g of flies were collected in Eppendorf tubes and frozen in liquid nitrogen. Frozen flies were  
615 crushed into a fine powder using a pre-cooled mortar pestle. The powder was incubated in  
616 lysis buffer (25mM HEPES, 150mM NaCl, 1mM EDTA, 0.1% TritonX-100, 1mM  
617 phenylmethylsulfonyl fluoride (PMSF), 1 complete EDTA-free protease inhibitor tablet  
618 (Roche/Sigma-Aldrich) ) for 30 min and then centrifuged in an Eppendorf tube for 30 min at  
619 16,000 g and 4°C. The supernatant was saved and snap frozen in liquid nitrogen.

620



621 **Immunoprecipitation to prepare extract for Mass Spectrometry**

622 ProteinG-Mag Sepharose (GE) beads were washed 3X with PBS, incubated for 2hrs with anti-  
623 GFP antibody. Beads were then incubated with the crude extracts for 6hrs at 4°C. Following  
624 3 washes with the wash buffer (25mM Hepes, 150mM NaCl, 1mM EDTA, 1mM PMSF, 1 tablet  
625 complete EDTA free protease inhibitor tablet), bound proteins were eluted by 15 min  
626 incubation in urea elution buffer (6–8 M Urea, 20 mM Tris pH 7.5, and 100 mM NaCl) or  
627 glycine elution buffer (100mM Glycine, pH 2.6. These eluates were neutralized by adding  
628 150mM Tris-Cl, p 8.8).

629  
630 **Mass-Spectrometry**

631 Eluted proteins in 8M urea were processed essentially as described by Engel and colleagues  
632 (Engel et al, 2014). Briefly, proteins were reduced by addition of 1/10 volume of 0.1 M DTT  
633 and incubated for 30 min at 37°C, followed by alkylation with a five-fold molar excess of  
634 iodoacetamide and incubation for 30 min at 37°C. Proteins were precipitated at -20°C by  
635 addition of 5 volumes cold acetone and incubation for 30 min at -20°C. All liquid was carefully  
636 removed, and the pellet dried in ambient air for 15 min before reconstitution of the proteins  
637 in 8 M urea, 50 mM Tris-HCl pH 8.0 to a final protein concentration between 0.2-0.3 mg/mL.  
638 Protein concentration was determined by Bradford assay. An aliquot corresponding to 5 µg  
639 protein was diluted to a final urea concentration of 2 M urea with 20 mM Tris-HCl pH 8.0, and  
640 2 mM CaCl<sub>2</sub>. Proteins were digested by trypsin (1:50 (w/w) trypsin/protein ratio) for 6 hours  
641 at 37°C. The digests were acidified with TFA (1%) and analyzed by LC-MS/MS (EASY-nLC 1000  
642 coupled to a QExactive HF mass spectrometer, ThermoFisher Scientific) with three repetitions  
643 injecting an aliquot of 500 ng protein. Peptides were trapped on an Acclaim PepMap100 C18  
644 pre-column (3µm, 100 Å, 75µm x 2 cm, ThermoFisher Scientific, Reinach, Switzerland) and  
645 separated by backflush on a C18 column (3µm, 100 Å, 75µm x 15 cm, Nikkyo Technos, Tokyo,  
646 Japan) by applying a 40 min gradient of 5% acetonitrile to 40% in water, 0.1% formic acid, at  
647 a flow rate of 300 nl/min. Peptides of m/z 400-1400 were detected at a resolution of  
648 60,000 m/z 250 with an automatic gain control (AGC) target of 1E06 and maximum ion  
649 injection time of 50 ms. A top fifteen data dependent method for precursor ion fragmentation  
650 was applied with the following settings: resolution 15,000, AGC of 1E05, maximum ion time  
651 of 110 ms, charge inclusion of 2+ to 7+ ions, peptide match on, and dynamic exclusion for 20  
652 sec, respectively.

653 Fragment spectra data were converted to mgf with ProteomeDiscoverer 2.0 and peptide  
654 identification made with EasyProt software searching against the forward and reversed  
655 UniprotKB *Drosophila melanogaster* protein database (Release 2016\_11), complemented  
656 with commonly found protein sequences of contaminating proteins, with the following  
657 parameters: parent mass error tolerance of 10 p.p.m., trypsin cleavage mode with three  
658 missed cleavages, static carbamidomethylation on Cys, variable oxidation on Met and  
659 acetylation on protein N-terminus. On the basis of reversed database peptide spectrum  
660 matches, a 1% false discovery rate was set for acceptance of target database matches, and  
661 only proteins with at least two different peptide sequences identified were allowed.

662

### 663 **Immunoprecipitation/Pull-down assays**

664 50µg of purified Mms19 (Tagged with 5X Histidine at C-terminus, synthesized by Genscript  
665 Inc and solubilized in 20mM Tris, 150mM NaCl, 0.5 M Arginine) was incubated with 50µg  
666 purified porcine tubulin (Purchased from Cytoskeleton Inc) at 4°C for 2 hrs. This mixture was  
667 subsequently incubated with Ni-NTA agarose (equilibrated with 20mM Tris-Cl and 250mM  
668 NaCl) for 1 hr at 4°C. The beads were then washed three times with wash buffer containing  
669 20mM Tris, 250mM NaCl and 20mM Imidazole and the bound proteins were eluted by adding  
670 elution buffer (20mM Tris, 250mM NaCl and 500mM Imidazole) to the resin on ice for 10 min.  
671 The eluate was then analyzed by probing Western blots with anti-Mms19 antibodies and  
672 rabbit anti-alpha tubulin antibodies.

673

### 674 ***In vitro* MT turbidity assay**

675 40µM solution of tubulin (porcine brain, Cytoskeleton, Inc) was prepared in Brinkley's buffer  
676 (BRB80, which contains 80mM PIPES buffer, 1mM EGTA, 2mM MgCl<sub>2</sub>) +10% glycerol and  
677 supplemented with 1mM GTP. The tubulin solution was then incubated with test proteins  
678 (MAPF 1mg/ml, Mms19 0.16mg/ml (concentration of Mms19 used was 1µM)) at 37°C and  
679 absorbance was measured at 340nm on a SpectraMax 340PC microplate reader (Molecular  
680 devices). Two negative controls were used: Mms19 only and Tubulin incubated with the  
681 solvent in which Mms19 is solubilized (20mM Tris-CL, 150mM NaCl, 0.5M Arginine). Results  
682 were validated from four independent experiments.

683

684 **Neuronal *in vitro* cultures**

685 Dissociated brain cells were cultured *in vitro* according to a protocol previously described  
686 (Egger et al, 2013). Briefly, 15-20 third instar larvae were dissected in PBS, and washed 3 times  
687 with Rinaldini solution (800 mg NaCl, 20 mg KCl, 5 mg NaH<sub>2</sub>PO<sub>4</sub>, 100 mg NaHCO<sub>3</sub>, 100 mg  
688 glucose, in 100 ml distilled water). The brains were then incubated in 0.5% collagenase I in  
689 Rinaldini solution for 60 min and subsequently washed 4 times in Schneider's medium. The  
690 treated tissues were then dissociated by pipetting 100-200 times. The resulting cell mixture  
691 was passed through a 40µm mesh to remove cell clusters, and the brain cells were then  
692 incubated for 24hrs at 25°C. After 24hrs incubation, the cells were plated on concanavalin A-  
693 coated coverslips, fixed and stained.

694

695 **Preparation of MTs for EM**

696 To obtain polymerized MTs, 20µM tubulin was incubated in the presence of 10µM taxol at  
697 37°C for 30min. The sample was then subjected to ultra-centrifugation for 10min at 100,000  
698 g at 4°C in a Beckman Airfuge ultracentrifuge. The supernatant containing un-polymerized  
699 dimers was then removed and the pellet was reconstituted with either 15µl BRB80/solvent  
700 (BRB80 components: 80mM PIPES buffer, 1mM EGTA, 2mM MgCl<sub>2</sub> + Mms19 solvent  
701 constituents: 20mM Tris-CL, 150mM NaCl, 0.5M Arginine ) or 15 µl of 0.5µM Mms19::5xHis  
702 in BRB80/solvent.

703

704 **Negative stain EM**

705 5 µl of samples were applied on glow discharged, carbon-coated copper EM grids for 1min.  
706 The excess sample was then washed off by dipping the grid in milli-Q water. The sample on  
707 the grid was then fixed/negatively stained with 2% Uranyl acetate for 30 sec and then the  
708 excess fluid was removed by using filter paper. The samples were imaged at a nominal  
709 magnification of 63,000x or 87,000x on a FEI Tecnai Spirit EM operated at 80eV and fitted  
710 with a digital camera. MT length and number of MT bundles were quantified from images  
711 obtained from three independent experiments.

712

713 **Fluorescent *in situ* hybridization (FISH)**

714 The protocol for FISH was adapted from Dernburg, 2011 with minor modifications. Briefly,  
715 third instar larval brains were dissected in PBS and fixed with 4% PFA. The brains were then

716 washed 3 times for 10min each with 2xSSCT (0.3M Sodium Chloride, 0.03M Sodium Citrate  
717 and 0.1% Tween 20) followed by 10min washes respectively with 2xSSCT/20% Formamide,  
718 2xSSCT/40% Formamide, 2xSSCT/50% Formamide. 100ng of the oligonucleotide probe: 5'  
719 Cy5-AACACAACACAACACAACACAACACAACACAACAC that binds to a specific region on the 2<sup>nd</sup>  
720 chromosome (Dernburg, 2011) was then added to the Hybridization buffer (20% dextran  
721 sulfate, 2xSSCT, 50% Formamide) and this solution was incubated with the brains in a PCR  
722 tube. The probes were then denatured at 92°C for 3 min and then allowed to anneal with the  
723 chromosomal DNA overnight at 37°C. The sample was then washed thrice at 37°C with the  
724 following solutions for 20min each: 2xSSCT/50% Formamide, 2xSSCT/40% Formamide,  
725 2xSSCT/20% Formamide. After two more washes with 2xSSCT, the sample was stained with  
726 Hoechst, mounted using Aqua-poly mount, and imaged on a Leica SP8 confocal microscope  
727 with a 63x objective.

728

### 729 **Statistical analysis**

730 Data was analyzed using Graph Pad prism 5.0 software. Means of two groups were compared  
731 and significance calculated by using unpaired students t-test. Multiple groups were  
732 compared, and significance calculated using the Kruskal-Wallis test and the Dunn's post-test.

733

734

### 735 **Acknowledgments**

736

737 We would like to thank Alex Bird, Carlo Largiader and our group members for helpful  
738 discussions and feedback. Our thanks also go to Regis Giet, Bruno Bello, Claudio Sunkel, Hiro  
739 Ohkura, Anne Marcil, Jordan Raff, the Bloomington Stock Center (University of Indiana), DSHB  
740 (University of Iowa) for providing antibodies and fly stocks, and FlyBase for excellent  
741 community support. The authors also wish to thank Manfred Heller, Sophie Braga and  
742 the Proteomics Mass Spectrometry Core facility at the University of Bern, Yury Belyaev of the  
743 Microscopy Imaging Center (University of Bern), and Beat Haenni and Benoit Zuber for their  
744 services and support.

745

746 **References:**

747

748 Barros, T. P., Kinoshita, K., Hyman, A. A., & Raff, J. W. (2005). Aurora A activates D-TACC-Msps  
749 complexes exclusively at centrosomes to stabilize centrosomal microtubules. *Journal of Cell*  
750 *Biology*. <https://doi.org/10.1083/jcb.200504097>

751 Ben-Shimon, L., Paul, V. D., David-Kadoch, G., Volpe, M., Stümpfig, M., Bill, E., ... Ben-Aroya,  
752 S. (2018). Fe-S cluster coordination of the chromokinesin KIF4A alters its subcellular  
753 localization during mitosis. *Journal of Cell Science*. <https://doi.org/10.1242/jcs.211433>

754 Bird, A. W., & Hyman, A. A. (2008). Building a spindle of the correct length in human cells  
755 requires the interaction between TPX2 and Aurora A. *Journal of Cell Biology*.  
756 <https://doi.org/10.1083/jcb.200802005>

757 Brouhard, G. J., Stear, J. H., Noetzel, T. L., Al-Bassam, J., Kinoshita, K., Harrison, S. C., ... Hyman,  
758 A. A. (2008). XMAP215 Is a Processive Microtubule Polymerase. *Cell*.  
759 <https://doi.org/10.1016/j.cell.2007.11.043>

760 Brugg, B., Reddy, D., & Matus, A. (1993). Attenuation of microtubule-associated protein 1B  
761 expression by antisense oligodeoxynucleotides inhibits initiation of neurite outgrowth.  
762 *Neuroscience*. [https://doi.org/10.1016/0306-4522\(93\)90401-Z](https://doi.org/10.1016/0306-4522(93)90401-Z)

763 Cabernard, C., & Doe, C. Q. (2013). Live imaging of neuroblast lineages within intact larval  
764 brains in *Drosophila*. *Cold Spring Harbor Protocols*, 2013(10), 970–977.  
765 <https://doi.org/10.1101/pdb.prot078162>

766 Cabernard, C., & Doe, C. Q. (2009). Apical/Basal Spindle Orientation Is Required for  
767 Neuroblast Homeostasis and Neuronal Differentiation in *Drosophila*. *Developmental Cell*.  
768 <https://doi.org/10.1016/j.devcel.2009.06.009>

769 Cameroni, E., Stettler, K., & Suter, B. (2010). On the traces of XPD: Cell cycle matters -  
770 untangling the genotype-phenotype relationship of XPD mutations. *Cell Division*, Vol. 5.  
771 <https://doi.org/10.1186/1747-1028-5-24>

772 Cardona, A., Saalfeld, S., Schindelin, J., Arganda-Carreras, I., Preibisch, S., Longair, M., ...  
773 Douglas, R. J. (2012). TrakEM2 software for neural circuit reconstruction. *PLoS ONE*.  
774 <https://doi.org/10.1371/journal.pone.0038011>

775 Chen, Y., & Hancock, W. O. (2015). Kinesin-5 is a microtubule polymerase. *Nature*  
776 *Communications*. <https://doi.org/10.1038/ncomms9160>

777 Chen, J., Larochelle, S., Li, X., & Suter, B. (2003). Xpd/Erc2 regulates CAK activity and mitotic  
778 progression. *Nature*, (424), 228–232.

779 Daul, A. L., Komori, H., & Lee, C. Y. (2010). Immunofluorescent staining of *Drosophila* larval  
780 brain tissue. *Cold Spring Harbor Protocols*, 5(7). <https://doi.org/10.1101/pdb.prot5460>

781 Dernburg, A. F. (2011). In situ hybridization to somatic chromosomes in *drosophila*. *Cold*  
782 *Spring Harbor Protocols*. <https://doi.org/10.1101/pdb.top065540>

- 783 Egger, B., Van Giesen, L., Moraru, M., & Sprecher, S. G. (2013). In vitro imaging of primary  
784 neural cell culture from *Drosophila*. *Nature Protocols*.  
785 <https://doi.org/10.1038/nprot.2013.052>
- 786 Engel, H., Mika, M., Denapaite, D., Hakenbeck, R., Mühlemann, K., Heller, M., ... Hilty, M.  
787 (2014). A low-affinity penicillin-binding protein 2x variant is required for heteroresistance in  
788 *Streptococcus pneumoniae*. *Antimicrobial Agents and Chemotherapy*.  
789 <https://doi.org/10.1128/AAC.02547-14>
- 790 Fink, G., Hajdo, L., Skowronek, K. J., Reuther, C., Kasprzak, A. A., & Diez, S. (2009). The mitotic  
791 kinesin-14 Ncd drives directional microtubule-microtubule sliding. *Nature Cell Biology*.  
792 <https://doi.org/10.1038/ncb1877>
- 793 Ferez, N. P., Gable, A., & Wadsworth, P. (2010). Mitotic functions of kinesin-5. *Seminars in*  
794 *Cell and Developmental Biology*. <https://doi.org/10.1016/j.semcdb.2010.01.019>
- 795 Gallaud, E., Caous, R., Pascal, A., Bazile, F., Gagné, J. P., Huet, S., ... Giet, R. (2014).  
796 Ensconsin/map7 promotes microtubule growth and centrosome separation in *Drosophila*  
797 neural stem cells. *Journal of Cell Biology*, 204(7), 1111–1121.  
798 <https://doi.org/10.1083/jcb.201311094>
- 799 Gari, K., Ortiz, A. M. L., Borel, V., Flynn, H., Skehel, J. M., & Boulton, S. J. (2012). MMS19 links  
800 cytoplasmic iron-sulfur cluster assembly to DNA metabolism. *Science*.  
801 <https://doi.org/10.1126/science.1219664>
- 802 Gergely, F., Kidd, D., Jeffers, K., Wakefield, J. G., & Raff, J. W. (2000). D-TACC: A novel  
803 centrosomal protein required for normal spindle function in the early *Drosophila* embryo.  
804 *EMBO Journal*. <https://doi.org/10.1093/emboj/19.2.241>
- 805 Giet, R., McLean, D., Descamps, S., Lee, M. J., Raff, J. W., Prigent, C., & Glover, D. M. (2002).  
806 *Drosophila* Aurora A kinase is required to localize D-TACC to centrosomes and to regulate  
807 astral microtubules. *Journal of Cell Biology*. <https://doi.org/10.1083/jcb.200108135>
- 808 Gutiérrez-Caballero, C., Burgess, S. G., Bayliss, R., & Royle, S. J. (2015). TACC3-ch-TOG track  
809 the growing tips of microtubules independently of clathrin and Aurora-A phosphorylation.  
810 *Biology Open*. <https://doi.org/10.1242/bio.201410843>
- 811 Homem, C. C. F., & Knoblich, J. A. (2012). *Drosophila* neuroblasts: a model for stem cell  
812 biology. *Development*, 139(23), 4297–4310. <https://doi.org/10.1242/dev.080515>
- 813 Ito, S., Tan, L. J., Andoh, D., Narita, T., Seki, M., Hirano, Y., ... Tanaka, K. (2010). MMXD, a TFIID-  
814 Independent XPD-MMS19 Protein Complex Involved in Chromosome Segregation. *Molecular*  
815 *Cell*, 39(4), 632–640. <https://doi.org/10.1016/j.molcel.2010.07.029>
- 816 Kesten, C., Schneider, R., & Persson, S. (2016). In vitro Microtubule Binding Assay and  
817 Dissociation Constant Estimation. *BIO-PROTOCOL*. <https://doi.org/10.21769/bioprotoc.1759>
- 818 Larochelle, S., Pandur, J., Fisher, R. P., Salz, H. K., & Suter, B. (1998). Cdk7 is essential for  
819 mitosis and for in vivo Cdk-activating kinase activity. *Genes and Development*, 12(3), 370–  
820 381. <https://doi.org/10.1101/gad.12.3.370>
- 821 Leary, A., Sim, S., Nazarova, E., Shulist, K., Genthial, R., Yang, S. K., ... Vogel, J. (2019).  
822 Successive Kinesin-5 Microtubule Crosslinking and Sliding Promote Fast, Irreversible

- 823 Formation of a Stereotyped Bipolar Spindle. *Current Biology*.  
824 <https://doi.org/10.1016/j.cub.2019.09.030>
- 825 Lee, T., & Luo, L. (2001). Mosaic analysis with a repressible cell marker (MARCM) for  
826 *Drosophila* neural development. *Trends in Neurosciences*. [https://doi.org/10.1016/S0166-](https://doi.org/10.1016/S0166-2236(00)01791-4)  
827 [2236\(00\)01791-4](https://doi.org/10.1016/S0166-2236(00)01791-4)
- 828 Lee, M. J., Gergely, F., Jeffers, K., Peak-Chew, S. Y., & Raff, J. W. (2001). Msps/XMAP215  
829 interacts with the centrosomal protein D-TACC to regulate microtubule behaviour. *Nature*  
830 *Cell Biology*, 3, 643–649.
- 831 Lee, C. Y., Andersen, R. O., Cabernard, C., Manning, L., Tran, K. D., Lanskey, M. J., ... Doe, C. Q.  
832 (2006). *Drosophila* Aurora-A kinase inhibits neuroblast self-renewal by regulating aPKC/Numb  
833 cortical polarity and spindle orientation. *Genes and Development*.  
834 <https://doi.org/10.1101/gad.1489406>
- 835 Li, X., Urwyler, O., & Suter, B. (2010). *Drosophila* Xpd regulates Cdk7 localization, mitotic  
836 kinase activity, spindle dynamics, and chromosome segregation. *PLoS Genetics*.  
837 <https://doi.org/10.1371/journal.pgen.1000876>
- 838 Miller, K. E., & Suter, D. M. (2018). An integrated cytoskeletal model of neurite outgrowth.  
839 *Frontiers in Cellular Neuroscience*. <https://doi.org/10.3389/fncel.2018.00447>
- 840 Minguez, P., Letunic, I., Parca, L., & Bork, P. (2013). PTMcode: A database of known and  
841 predicted functional associations between post-translational modifications in proteins.  
842 *Nucleic Acids Research*. <https://doi.org/10.1093/nar/gks1230>
- 843 Mirigian, M., Mukherjee, K., Bane, S. L., & Sackett, D. L. (2013). Measurement of In vitro  
844 microtubule polymerization by turbidity and fluorescence. *Methods in Cell Biology*, 115, 215–  
845 229. <https://doi.org/10.1016/B978-0-12-407757-7.00014-1>
- 846 Moon, H. M., Youn, Y. H., Pemble, H., Yingling, J., Wittmann, T., & Wynshaw-Boris, A. (2014).  
847 LIS1 controls mitosis and mitotic spindle organization via the LIS1-NDEL1-dynein complex.  
848 *Human Molecular Genetics*. <https://doi.org/10.1093/hmg/ddt436>
- 849 Nag, R., Niggli, S., Sousa-Guimaraes, S., Vazquez-Pianzola, P., & Suter, B. (2018). Mms19 is a  
850 mitotic gene that permits Cdk7 to be fully active as a Cdk-activating kinase. *Development*,  
851 145(2).
- 852 Needleman, S. B., & Wunsch, C. D. (1970). A general method applicable to the search for  
853 similarities in the amino acid sequence of two proteins. *Journal of Molecular Biology*.  
854 [https://doi.org/10.1016/0022-2836\(70\)90057-4](https://doi.org/10.1016/0022-2836(70)90057-4)
- 855 Paul, V. D., & Lill, R. (2015). Biogenesis of cytosolic and nuclear iron-sulfur proteins and their  
856 role in genome stability. *Biochimica et Biophysica Acta - Molecular Cell Research*.  
857 <https://doi.org/10.1016/j.bbamcr.2014.12.018>
- 858 Pearson, C. G., & Bloom, K. (2004). Dynamic microtubules lead the way for spindle positioning.  
859 *Nature Reviews Molecular Cell Biology*. <https://doi.org/10.1038/nrm1402>
- 860 Prakash, L., & Prakash, S. (1977). Isolation and characterization of MMS-sensitive mutants of  
861 *Saccharomyces cerevisiae*. *Genetics*.

- 862 Prakash, L., & Prakash, S. (1979). Three additional genes involved in pyrimidine dimer removal  
863 in *Saccharomyces cerevisiae*: RAD7, RAD14 and MMS19. *MGG Molecular & General Genetics*.  
864 <https://doi.org/10.1007/BF00333097>
- 865 Rolls, M. M., Albertson, R., Shih, H. P., Lee, C. Y., & Doe, C. Q. (2003). *Drosophila* aPKC  
866 regulates cell polarity and cell proliferation in neuroblasts and epithelia. *Journal of Cell*  
867 *Biology*. <https://doi.org/10.1083/jcb.200306079>
- 868 Royle, S. J. (2012). The role of clathrin in mitotic spindle organisation. *Journal of Cell Science*.  
869 <https://doi.org/10.1242/jcs.094607>
- 870 Sainath, R., & Gallo, G. (2014). Cytoskeletal and signaling mechanisms of neurite formation.  
871 *Cell and Tissue Research*. <https://doi.org/10.1007/s00441-014-1955-0>
- 872 Schindelin, J., Arganda-Carreras, I., Frise, E., Kaynig, V., Longair, M., Pietzsch, T., ... Cardona,  
873 A. (2012). Fiji: an open-source platform for biological-image analysis. *Nature Methods*, 9, 676–  
874 682.
- 875 Schuldt, A. J., Adams, J. H. J., Davidson, C. M., Micklem, D. R., Haseloff, J., St. Johnston, D., &  
876 Brand, A. H. (1998). Miranda mediates asymmetric protein and RNA localization in the  
877 developing nervous system. *Genes and Development*.  
878 <https://doi.org/10.1101/gad.12.12.1847>
- 879 Sharp, D. J., Kuriyama, R., Essner, R., & Baas, P. W. (1997). Expression of a minus-end-directed  
880 motor protein induces Sf9 cells to form axon-like processes with uniform microtubule polarity  
881 orientation. *Journal of Cell Science*, 110 (19), 2373-80
- 882 Stehling, O., Vashisht, A. A., Mascarenhas, J., Jonsson, Z. O., Sharma, T., Netz, D. J. A., ... Lill,  
883 R. (2012). MMS19 assembles iron-sulfur proteins required for DNA metabolism and genomic  
884 integrity. *Science*. <https://doi.org/10.1126/science.1219723>
- 885 Van Horn, R. D., Chu, S., Fan, L., Yin, T., Du, J., Beckmann, R., ... Ye, X. S. (2010). Cdk1 activity  
886 is required for mitotic activation of Aurora A during G 2/M transition of human cells. *Journal*  
887 *of Biological Chemistry*. <https://doi.org/10.1074/jbc.M110.141010>
- 888 Van Wietmarschen, N., Moradian, A., Morin, G. B., Lansdorp, P. M., & Uringa, E. J. (2012). The  
889 mammalian proteins MMS19, MIP18, and ANT2 are involved in cytoplasmic iron-sulfur cluster  
890 protein assembly. *Journal of Biological Chemistry*. <https://doi.org/10.1074/jbc.M112.431270>
- 891 Vashisht, A. A., Yu, C. C., Sharma, T., Ro, K., & Wohlschlegel, J. A. (2015). The association of  
892 the xeroderma pigmentosum group D DNA helicase (XPD) with transcription factor IIH is  
893 regulated by the cytosolic iron-sulfur cluster assembly pathway. *Journal of Biological*  
894 *Chemistry*, 290(22), 14218–14225. <https://doi.org/10.1074/jbc.M115.650762>
- 895 Weon, J. L., Yang, S. W., & Potts, P. R. (2018). Cytosolic Iron-Sulfur Assembly Is Evolutionarily  
896 Tuned by a Cancer-Amplified Ubiquitin Ligase. *Molecular Cell*.  
897 <https://doi.org/10.1016/j.molcel.2017.11.010>
- 898 Williams, B. C., Riedy, M. F., Williams, E. V., Gatti, M., & Goldberg, M. L. (1995). The *Drosophila*  
899 kinesin-like protein KLP3A is a midbody component required for central spindle assembly and  
900 initiation of cytokinesis. *Journal of Cell Biology*. <https://doi.org/10.1083/jcb.129.3.709>
- 901 Yang, Y., Liu, M., Li, D., Ran, J., Gao, J., Suo, S., ... Zhou, J. (2014). CYLD regulates spindle  
902 orientation by stabilizing astral microtubules and promoting dishevelled-NuMA-dynein/



- 903 dynactin complex formation. Proceedings of the National Academy of Sciences of the United  
904 States of America. <https://doi.org/10.1073/pnas.1319341111>
- 905 Yeom, E., Hong, S. T., & Choi, K. W. (2015). Crumbs interacts with Xpd for nuclear division  
906 control in *Drosophila*. *Oncogene*. <https://doi.org/10.1038/onc.2014.202>
- 907 Zhou, Y., Yang, S., Mao, T., & Zhang, Z. (2015). MAPanalyzer: A novel online tool for analyzing  
908 microtubule-associated proteins. Database. <https://doi.org/10.1093/database/bav108>
- 909 Zhu, Z. C., Gupta, K. K., Slabbekoorn, A. R., Paulson, B. A., Folker, E. S., & Goodson, H. V. (2009).  
910 Interactions between EB1 and microtubules: Dramatic effect of affinity tags and evidence for  
911 cooperative behavior. *Journal of Biological Chemistry*, 284(47), 32651–32661.  
912 <https://doi.org/10.1074/jbc.M109.013466>
- 913

## 914 **Figure Legends**

915

916 **Figure 1. *Mms19<sup>P</sup>* brains display a microcephaly (small brain) phenotype.** 3<sup>rd</sup> instar larval  
917 brain NBs were visualized by staining for Miranda (red, cytoplasmic) and pH3 (white,  
918 nuclear); DNA (Hoechst 33342 dye) is shown in blue. (A)-(C) A WT brain lobe can be  
919 subdivided into the OL (shaded green) and the CB (shaded red). *Mms19<sup>P</sup>* brains appear  
920 smaller, with a diminished OL. Overexpressing the CAK complex components driven by  
921 daughterless-Gal4 (*da>CAK*) in the *Mms19<sup>P</sup>* background did not rescue the phenotype.  
922 *Mms19::eGFP* expressed in the *Mms19<sup>P</sup>* background rescued the *Mms19<sup>P</sup>* phenotype.  
923 Although the number of NBs per brain lobe is similar across all genotypes (D), the volume of  
924 the brain lobe is significantly reduced in the *Mms19<sup>P</sup>* and *da>CAK, Mms19<sup>P</sup>* brains (E).  
925 Furthermore, segmentation and volume measurement of the OL and CB revealed a  
926 significant reduction in *Mms19<sup>P</sup>* and *da>CAK, Mms19<sup>P</sup>* brains. The brain volume and  
927 morphology were restored to WT levels when *Mms19::eGFP* was expressed in *Mms19<sup>P</sup>*  
928 brains (E)-(G). n=15 (15 brains, 30 lobes). Statistical significance (SS) was determined by the  
929 Kruskal-Wallis test. Multiple columns were compared using Dunn's posttest, \*\*\*( $P<0.001$ ),  
930 scale=25 $\mu$ m.

931

932 **Figure 2. NBs depend on *Mms19* for timely and coordinated spindle assembly and spindle**  
933 **orientation.** (A) WT NBs typically finish cytokinesis 10 min after the onset of nuclear  
934 envelope breakdown (NEBD). (B) *Mms19<sup>P</sup>* NBs require on average 20 min to reach  
935 cytokinesis after NEBD. (B, B') In around 10% the mutant cells, the spindle poles are not fully  
936 separated at NEBD and the spindle initially appears kinked. In around 20% of *Mms19<sup>P</sup>* NBs,  
937 the spindles change their orientation throughout the course of mitosis. (C) In this particular  
938 mutant case, MTs are initially seen to emanate only from a single pole, but subsequently,  
939 the other pole also nucleates MTs. The quantitative assessment of the duration of WT and  
940 *Mms19<sup>P</sup>* mitoses is compared in (D). SS was determined by an unpaired t-test (\*\*\*) $P<0.001$ );  
941 Scale=5 $\mu$ m; n=30 NBs. Kinked spindles and mis-oriented spindles are quantified in (E).

942

943 **Figure 3: *Mms19* is required to form a spindle of normal length and density.**  
944 (A-A') Z projection of a typical bipolar spindle in a WT NB with the spindle poles anchored to  
945 the cell cortex. (B-B') short spindle found in *Mms19<sup>P</sup>* NBs. the spindle is abnormally short  
946 and the spindle poles are detached from the cortex. (C) WT spindles are significantly longer  
947 than *Mms19<sup>P</sup>* and *da>CAK, Mms19<sup>P</sup>* spindles. (D) Graph comparing cell diameters between  
948 the different genotypes. WT NBs are bigger than *Mms19<sup>P</sup>* and *da>CAK, Mms19<sup>P</sup>* cells. (E) In  
949 order to quantify the short spindles, I normalized the spindle lengths to the cell diameters. If  
950 this ratio was equal to or less than 0.6, I considered these as 'short spindles'. (F) Graph  
951 comparing the percentage of 'short spindles' across different genotypes. n= 90 NBs.  
952 Relative density of astral MTs was quantified and compared across all genotypes. Maximum  
953 intensity projections of mitotic NBs were obtained and the relative density of astral MTs was  
954 quantified as shown in (G). (H) Astral MT density and (I) Inner spindle fluorescent intensity  
955 was measured in fixed NBs immunostained for  $\alpha$ Tubulin and compared across all the  
956 genotypes n= 60 NBs. SS was calculated using Kruskal-Wallis test, columns were compared  
957 using Dunn's post test (\*\*\*\* $P<0.0001$ , \*\*\* $P<0.001$ , \*\* $P<0.01$ , \* $P<0.05$ ), scale=5 $\mu$ m.

958

959 **Figure 4. *Mms19* assists MT polymerization *in vivo*.** (A) WT and *Mms19<sup>P</sup>* NBs expressing  
960 EB1::GFP were imaged live and time-lapse movies were acquired to calculate the velocity of

961 EB1::GFP labelled MT 'plus' ends. The velocities represented in (A') show reduced MT  
962 growth velocity in *Mms19<sup>P</sup>* NB spindles. n=11 cells, 5 particles analyzed from each cell (B-B')  
963 EB1::GFP velocities were compared across WT and *Mms19<sup>P</sup>* in the glia. SS for A' and B' was  
964 calculated using unpaired t-test, (\*\* $P < 0.01$ ) (\*\*\*) $P < 0.001$ ), scale bar=5 $\mu$ m. n=15 brains, 10  
965 particles analyzed from each brain (C) In a WT NB, a spindle is seen to be fully assembled  
966 approximately 3 minutes after NEBD. (D) On the other hand, in most *Mms19<sup>P</sup>* NBs, spindle  
967 assembly seemed to be delayed.

968

969 **Figure 5. *Mms19* is required for spindle re-polymerization.** After cold treatment, spindle re-  
970 assembly was analyzed at 0 sec (i.e. immediately after cold treatment; left panel), 30 sec  
971 (central panel) and 90 sec (right panel) after shifting them to 25°C. At 0 sec in the WT (A),  
972 only the centrosomes were visible but after incubation at 30 sec a few fibers nucleated from  
973 the centrosomes. At 90 sec, the spindle regained its normal shape. In *Mms19<sup>P</sup>* NBs (B),  
974 spindles did not regain the normal shape after 90 sec. Additionally, the microtubule density  
975 was reduced in the stunted spindles. Expression of *Mms19::eGFP* in the mutant background  
976 (C), rescued spindle reformation, but overexpression of *CAK* (D) rescued only partially and  
977 the length and density of MT still appeared reduced. (E) Chart comparing length of spindles  
978 after 90 sec incubation at 25°C. (F) The box plot (G) shows the spindle length relative to the  
979 cell diameter, thus eliminating variations due to varying cell sizes. SS was calculated by  
980 Kruskal-Wallis test, columns were compared by Dunn's posttest (\*\*\*) $P < 0.001$ ), scale=5 $\mu$ m,  
981 n=60 (F) The graph compares the percentage of 'short spindles' across different genotypes.

982

983 **Figure 6. Centrosomal localization of the MT regulator TACC depends on *Mms19*.** (A) A  
984 mitotic NB shows TACC localization at the spindle poles. (B, D) >50% of analyzed *Mms19<sup>P</sup>*  
985 NBs fail to localize TACC to spindle poles. (C, D) TACC localization was restored upon  
986 overexpression of the *CAK* subunits *Cdk7*, *CycH* and *Mat1* in the *Mms19<sup>P</sup>* background. (E)  
987 The amount of TACC localized on the centrosomes was quantified by comparing the  
988 fluorescent intensity of the centrosomal TACC signal to the TACC signal on the spindles. A  
989 ratio greater than 1 was considered as clear centrosomal TACC, while a ratio equal to or less  
990 than 1 indicated unlocalized TACC. SS was calculated by Kruskal-Wallis test, columns were  
991 compared by Dunn's posttest (\*\*\*) $P < 0.001$ ), scale=5 $\mu$ m. n=60 NBs. (F, G) NBs were stained  
992 with antibodies against  $\gamma$ Tubulin to test for centrosomal localization. (G) TACC co-localized  
993 with  $\gamma$ Tubulin on the centrosomes. (F) In the mutant NB TACC fails to concentrate at  
994  $\gamma$ Tubulin foci.

995

996 **Figure 7. *Mms19::5xHis* binds to tubulin and stimulates MT assembly *in vitro*.** *Mms19*-  
997 Tubulin interaction using a pull-down assay performed at 4°C. Purified tubulin and  
998 *Mms19::5xHis* were first incubated at equimolar ratios and subsequently with Ni-NTA resin  
999 which binds His-tags. (A) Input panels show Tubulin added, either alone or with *Mms19*. (B)  
1000 Tubulin was found binding to the resin only upon prior incubation with *Mms19::5xHis*.  
1001 Tubulin added alone did not bind to the resin. (C) Purified *Mms19* was incubated with  
1002 tubulin in the presence of GTP and the absorbance was measured at 340nm at 35°C to  
1003 assess polymerization. MAPF (Cytoskeleton Inc.) was used as a positive control, whereas  
1004 *Mms19* alone and tubulin with solvent (the solvent in which *Mms19* was reconstituted)  
1005 were used as negative controls. (D-D') Absorbance of MTs increases when incubated with  
1006 *Mms19*, but sharply decreases after incubating this mixture on ice for 10 minutes. (E) MTs  
1007 only (without *Mms19::5xHis* added) visualized by negative stain EM. Here, a MT fiber can be

1008 seen depolymerizing (indicated by arrow). (F) In a Mms19::5xHis-MT mixture, discreet  
1009 particles can be seen binding laterally along the surface of MT. (G) Measuring the length of  
1010 MT fibers revealed that MTs were generally longer when incubated with Mms19::5xHis and  
1011 tubulin, compared to tubulin to which only the BRB80/solvent buffer was added. n=150  
1012 MTs, ss was calculated using unpaired t-test, \*\*\*\*p<0.0001. MT bundles containing 2 (H) or  
1013 more than 2 MTs (I) were more frequently observed upon addition of Mms19::5xHis to MTs.  
1014

## Supporting Information legends

### Supporting Figures

**Figure S1: Higher fraction of Mms19P NBs in mitosis.** (A) NBs were classified into 1) G1/G0 phase if they did not stain for either EdU or pH3; 2) S phase if the NBs stained positively for EdU; 3) M phase for NBs staining positively only for pH3 and 4) G2/M for cells staining positively for both EdU and pH3. The G2/M cells are cells transitioning from G2 to M phase. NBs in each phase were counted per brain lobe and this data was represented as percentage (e.g. if in one brain lobe 20 out of 100 NBs were pH3 positive, then 20% cells were classified as in M phase). The percentages for each phase were compiled and compared per brain lobe across the 4 genotypes. Box plot charts represent percentage of cells in (B) G1/G0 phase, (C) S phase and (D) G2/M phase. (E) M phase. 30 brain lobes per genotype were analyzed. SS was calculated using Kruskal-Wallis test, columns compared using Dunn's post test, \*\*\*( $P < 0.001$ ), \*( $P < 0.05$ ). Scale=5 $\mu$ m.

**Figure S2: *Mms19* is cell autonomously required to maintain normal cell numbers in MARCM clones.** (A)-(C) In order to study cell cycle progression in a single NB lineage, we used the Mosaic Analysis with a Repressible Cell Marker (MARCM) technique (Lee and Luo, 2001). This technique utilizes the UAS-GAL4-GAL80 system and the FLP-FRT recombination system. With this technique, a population of cells arising from the same progenitor can be specifically labeled. Additionally, the progenitor cell can carry a mutation along with a GFP marker. Defects in this cell, along with its progeny can be analyzed in an otherwise WT background. (E) MARCM clones were induced in NBs in 24hrs old larvae. These larvae were dissected after another 48hrs to determine the number of cells per clone in *Mms19P* and WT/control clones. (F) The graph shows a significant reduction in numbers of cells in mutant clones. SS was determined by an unpaired t-test (\*\* $P < 0.01$ ), scale=5 $\mu$ m, n=60 clones from each genotype.

**Figure S3: Model for mitotic and post-mitotic pathways of Mms19.** (A) Mms19 binds to Xpd, thereby releasing the CAK complex to activate its mitotic targets. (B) Downregulation of Mms19 by mutations, knock-down or proteasome mediated degradation allows Xpd to associate with CAK and core TFIIF, thereby targeting Cdk7 activity away from the mitotic targets and towards transcriptional targets like the PolII- CTD (Cameroni et al, 2010). (C) Mms19 binds to MTs and promotes MT stability and bundling, contributing significantly to establishing extended MT structures such as mitotic spindles and possibly the MTs driving neurite outgrowth.

**Figure S4: *Mms19P* NBs show spindle orientation defects.** (A) Spindle orientation in the WT NBs is tightly coupled to the apical-basal polarity axis. (B) In a fraction of *Mms19P* NBs the spindle appears mis-oriented with respect to the Mira crescent localization. (D-E) Quantification of the spindle angle revealed that a considerably higher number of *Mms19P* NBs are oriented at an angle of more than 10° w.r.t Mira. n=65, scale=5 $\mu$ m.

**Figure S5: *Mms19P* NBs do not display high levels of aneuploidy.** (A) WT, *Mms19P* and *da>CAK*, *Mms19P* brains were fixed and fluorescent *in situ* hybridization was performed on them. Cy5-labelled DNA probes that specifically bind to regions on the 2nd chromosome were used to determine the number of chromosomes. (A) the signal is seen as 2 dots in the WT NBs corresponding to the diploid state of the cell. (B) An example of an aneuploid *Mms19P* NB showing 3 dots. (C) However, aneuploid cells in both *Mms19P* and *da>CAK*, *Mms19P* NBs were extremely rare. SS was calculated using Fisher's exact test.

**Figure S6: *Mms19* is necessary for centrosomal localization of Msps in NBs.** (A, C) WT and *da>CAK*, *Mms19P* NBs showing Msps localization on centrosomes and spindles. (B) In *Mms19P*

NBs, Msp<sub>s</sub> does not concentrate on centrosomes. (D) To quantify centrosomal accumulation of Msp<sub>s</sub>, an analysis similar to that done in Fig 6 was performed. SS was calculated using Kruskal-Wallis test, columns compared using Dunn's post test, \*\*\*( $P < 0.001$ ), scale=5 $\mu$ m, n=30.

**Figure S7:** Putative ubiquitination site in *Drosophila* Mms19: A pairwise sequence alignment of the human MMS19 and *Drosophila* Mms19. The alignment performed was based on the Needleman-Wunsch algorithm (Needleman and Wunsch, 1970; [https://www.ebi.ac.uk/Tools/psa/emboss\\_needle/](https://www.ebi.ac.uk/Tools/psa/emboss_needle/)). Analysis of both sequences by the PTMcode 2 software indicates that the C-terminal K993 site in the Human protein is conserved in the *Drosophila* Mms19 at K921.

**Figure S8: *Mms19<sup>P</sup>* neurons are unable to form long neurites in culture.** (A) WT NBs differentiated into neurons and extended neurites after 24hrs in culture. Neurons were positive for Elav (marker for post mitotic neuronal nuclei). (B) *Mms19<sup>P</sup>* neurons stained positively for Elav after 24hrs in culture, indicating that these neurons had differentiated. (C) *Mms19<sup>P</sup>* neurons, did not grow extended neurites after 24hrs or even (D) 48hrs in culture. Scale bar=5 $\mu$ m.

## Supporting Tables

**Supplementary Table 1.** The table lists proteins found to exclusively co-purify with Mms19::eGFP. CIA proteins, which are already known to form a complex with Mms19, are highlighted in **Red**. Microtubule associated proteins are highlighted in **Green**.

**Supplementary Table 2.** Proteins that bound to the anti-GFP antibody coated beads from all three fly extracts are listed. These include different isoforms of  $\alpha$ - and  $\beta$ tubulin that were identified in all extracts. However, the PMSS scores are higher for the tubulin isoforms immuno-precipitating from the Mms19::eGFP extract. This indicates that tubulin was enriched in the Mms19::eGFP fraction compared to the wild-type control.

## Supporting Movies

### Mov 01:

**Analysis of mitosis duration in WT NB:** WT brains expressing EB1::GFP were dissected, mounted on a stainless steel chamber (Cabernard et al, 2013) and NB mitosis was imaged with a 63x objective on a spinning disk confocal microscope. Mitosis duration was measured from NEBD onset (start at 0 min) until cytokinesis. Scale=5 $\mu$ m

### Mov 02:

**Analysis of mitosis duration in *Mms19<sup>P</sup>* NB:** Mitosis was visualized in *Mms19<sup>P</sup>* brain NBs expressing EB1::GFP. On average, *Mms19<sup>P</sup>* brain NBs took twice as long as WT NBs to finish mitosis. In this presented case, the NB completes mitosis 22min after NEBD onset with cytokinesis. Scale=5 $\mu$ m

**Mov 03:**

**Spindle assembly defect in *Mms19<sup>P</sup>* NB:** In around 10% of EB1::GFP expressing *Mms19<sup>P</sup>* brain NBs, the spindle starts assembling before the centrosomes have migrated to the opposite sides, forming a 'kinked' spindle at 4min post NEBD onset. This indicates that *Mms19* is needed for coordinating spindle formation with cell cycle progression. Scale=5 $\mu$ m

**Mov 04:**

**Analysis of EB1::GFP labelled MT velocity in WT NBs:** In order to determine the speed of growing MT tips, WT brains expressing EB1::GFP were dissected, mounted on a stainless steel chamber (Cabernard et al, 2013) and spindles were imaged with a 100x objective on a spinning disk confocal microscope. Images were acquired at an interval of 500ms for 1min. Scale=5 $\mu$ m.

**Mov 05:**

**Analysis of EB1::GFP labelled MT velocity in *Mms19<sup>P</sup>* NBs:** Live imaging was performed on *Mms19<sup>P</sup>* brain NB spindles to determine the velocity of growing MT tips. Images were acquired at an interval of 500ms for 1min. The spindle shown here appears to tilt repeatedly, perhaps due to defects in astral MT assembly (Fig 2, Fig 6). Scale=5 $\mu$ m.

**Mov 06:**

**Measuring MT plus tip speeds in post mitotic surface glia of WT brains:** In order to determine whether *Mms19* affects MT growth in post mitotic cells, WT brains expressing EB1::GFP were dissected, mounted on a stainless steel chamber (Cabernard et al, 2013) and MT growth in surface glia was imaged with a 100x objective on a spinning disk confocal microscope. Images were acquired at an interval of 500ms. Scale=5 $\mu$ m.

**Mov 07:**

**Measuring MT plus tip speeds in post mitotic surface glia of *Mms19<sup>P</sup>* brains:** MT growth in EB1::GFP expressing *Mms19<sup>P</sup>* surface glia was visualized using spinning disk confocal microscopy. Images were acquired at an interval of 500ms. Scale=5 $\mu$ m.

# Figure 6: Centrosomal localization of the MT regulator TACC depends on Mms19

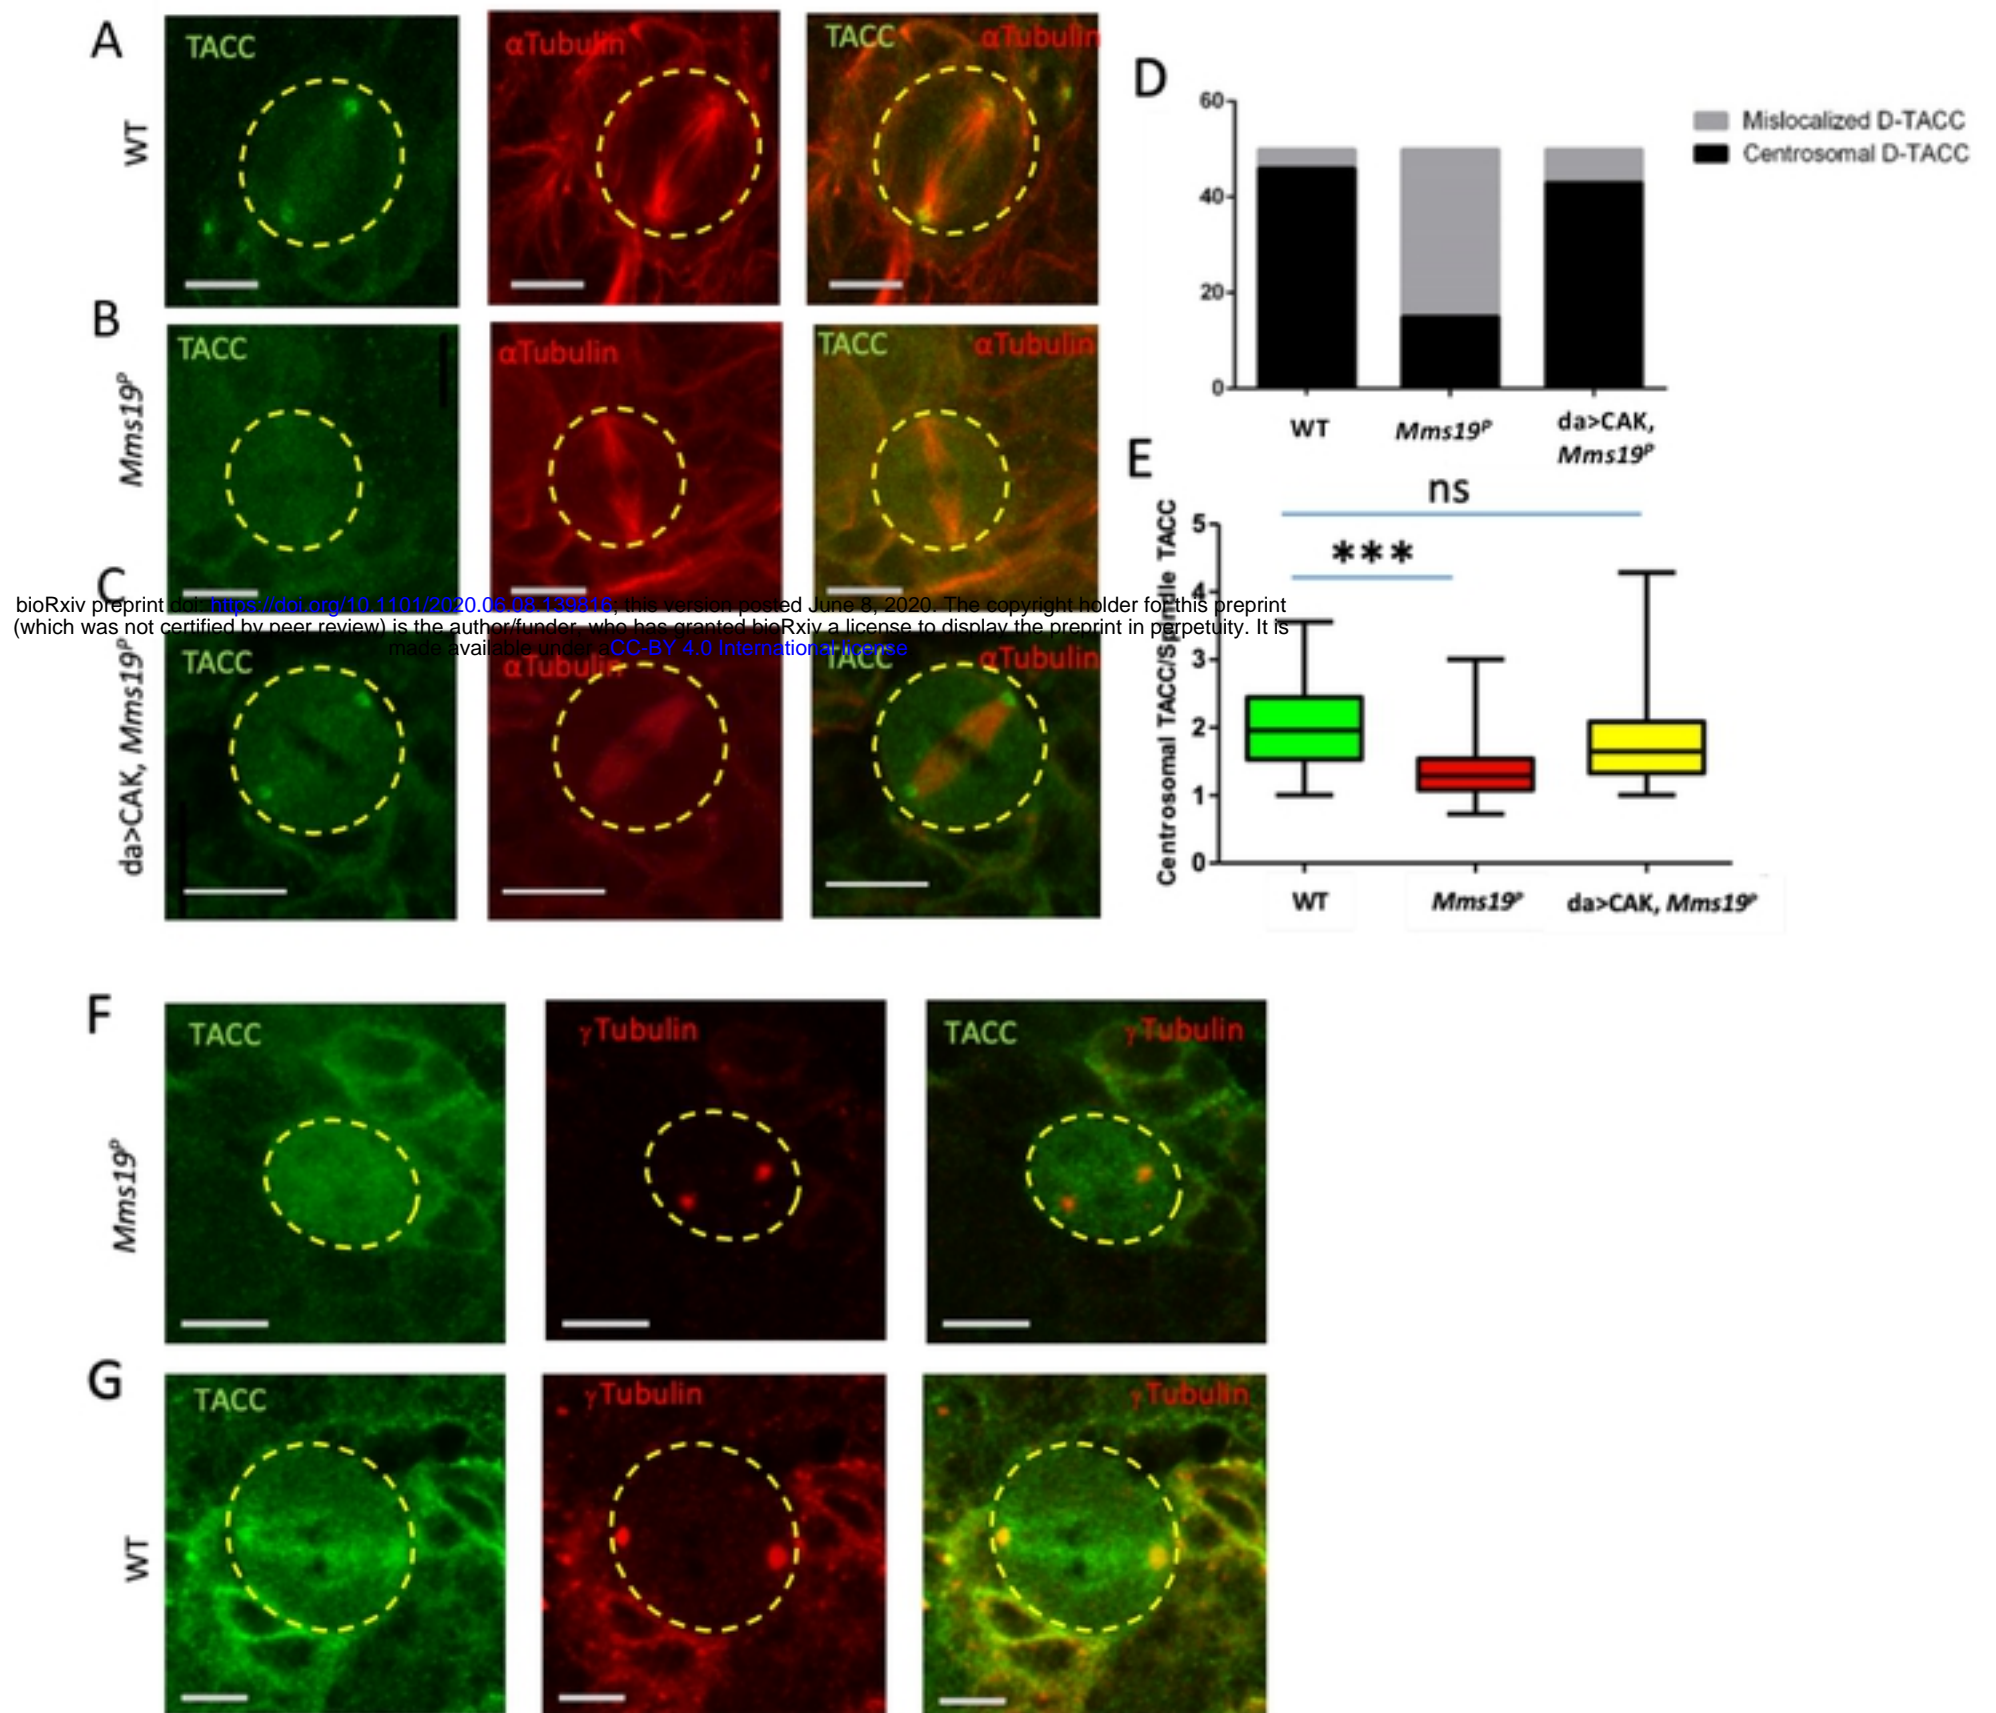



**Figure 7: Mms19 binds to tubulin and stimulates MT assembly *in vitro*.**

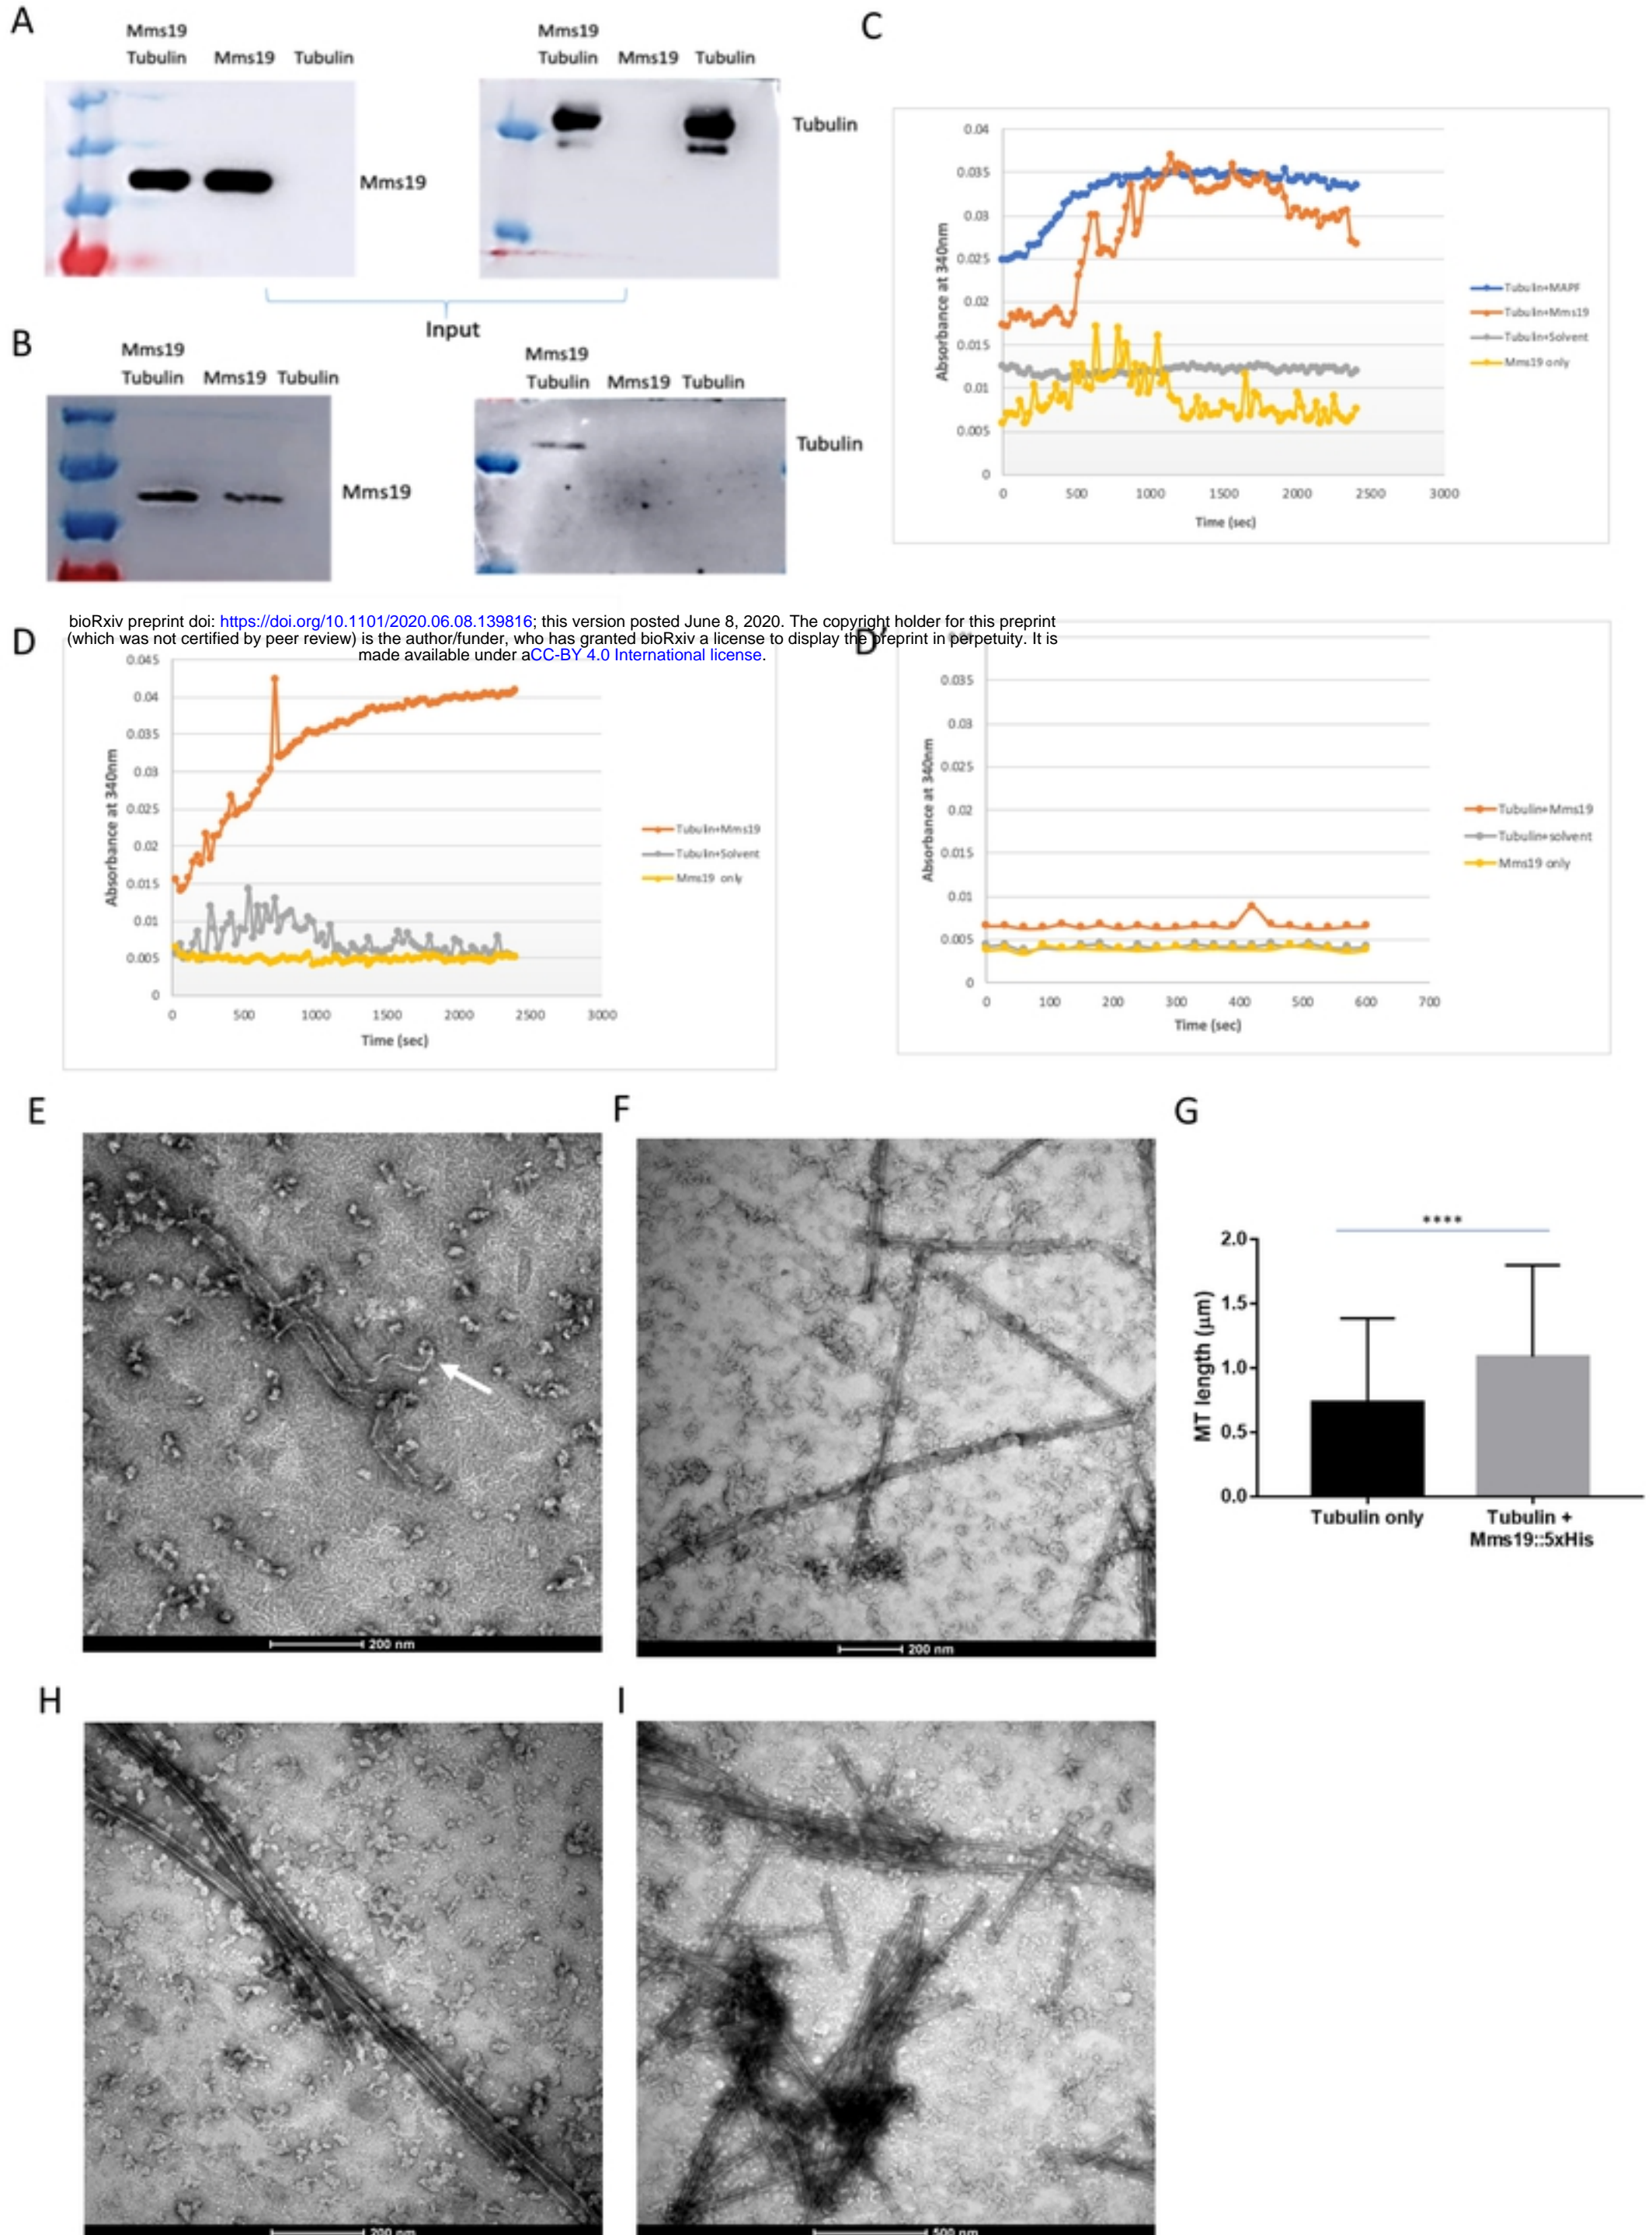

**Figure 4: *Mms19* assists MT polymerization *in vivo*.**

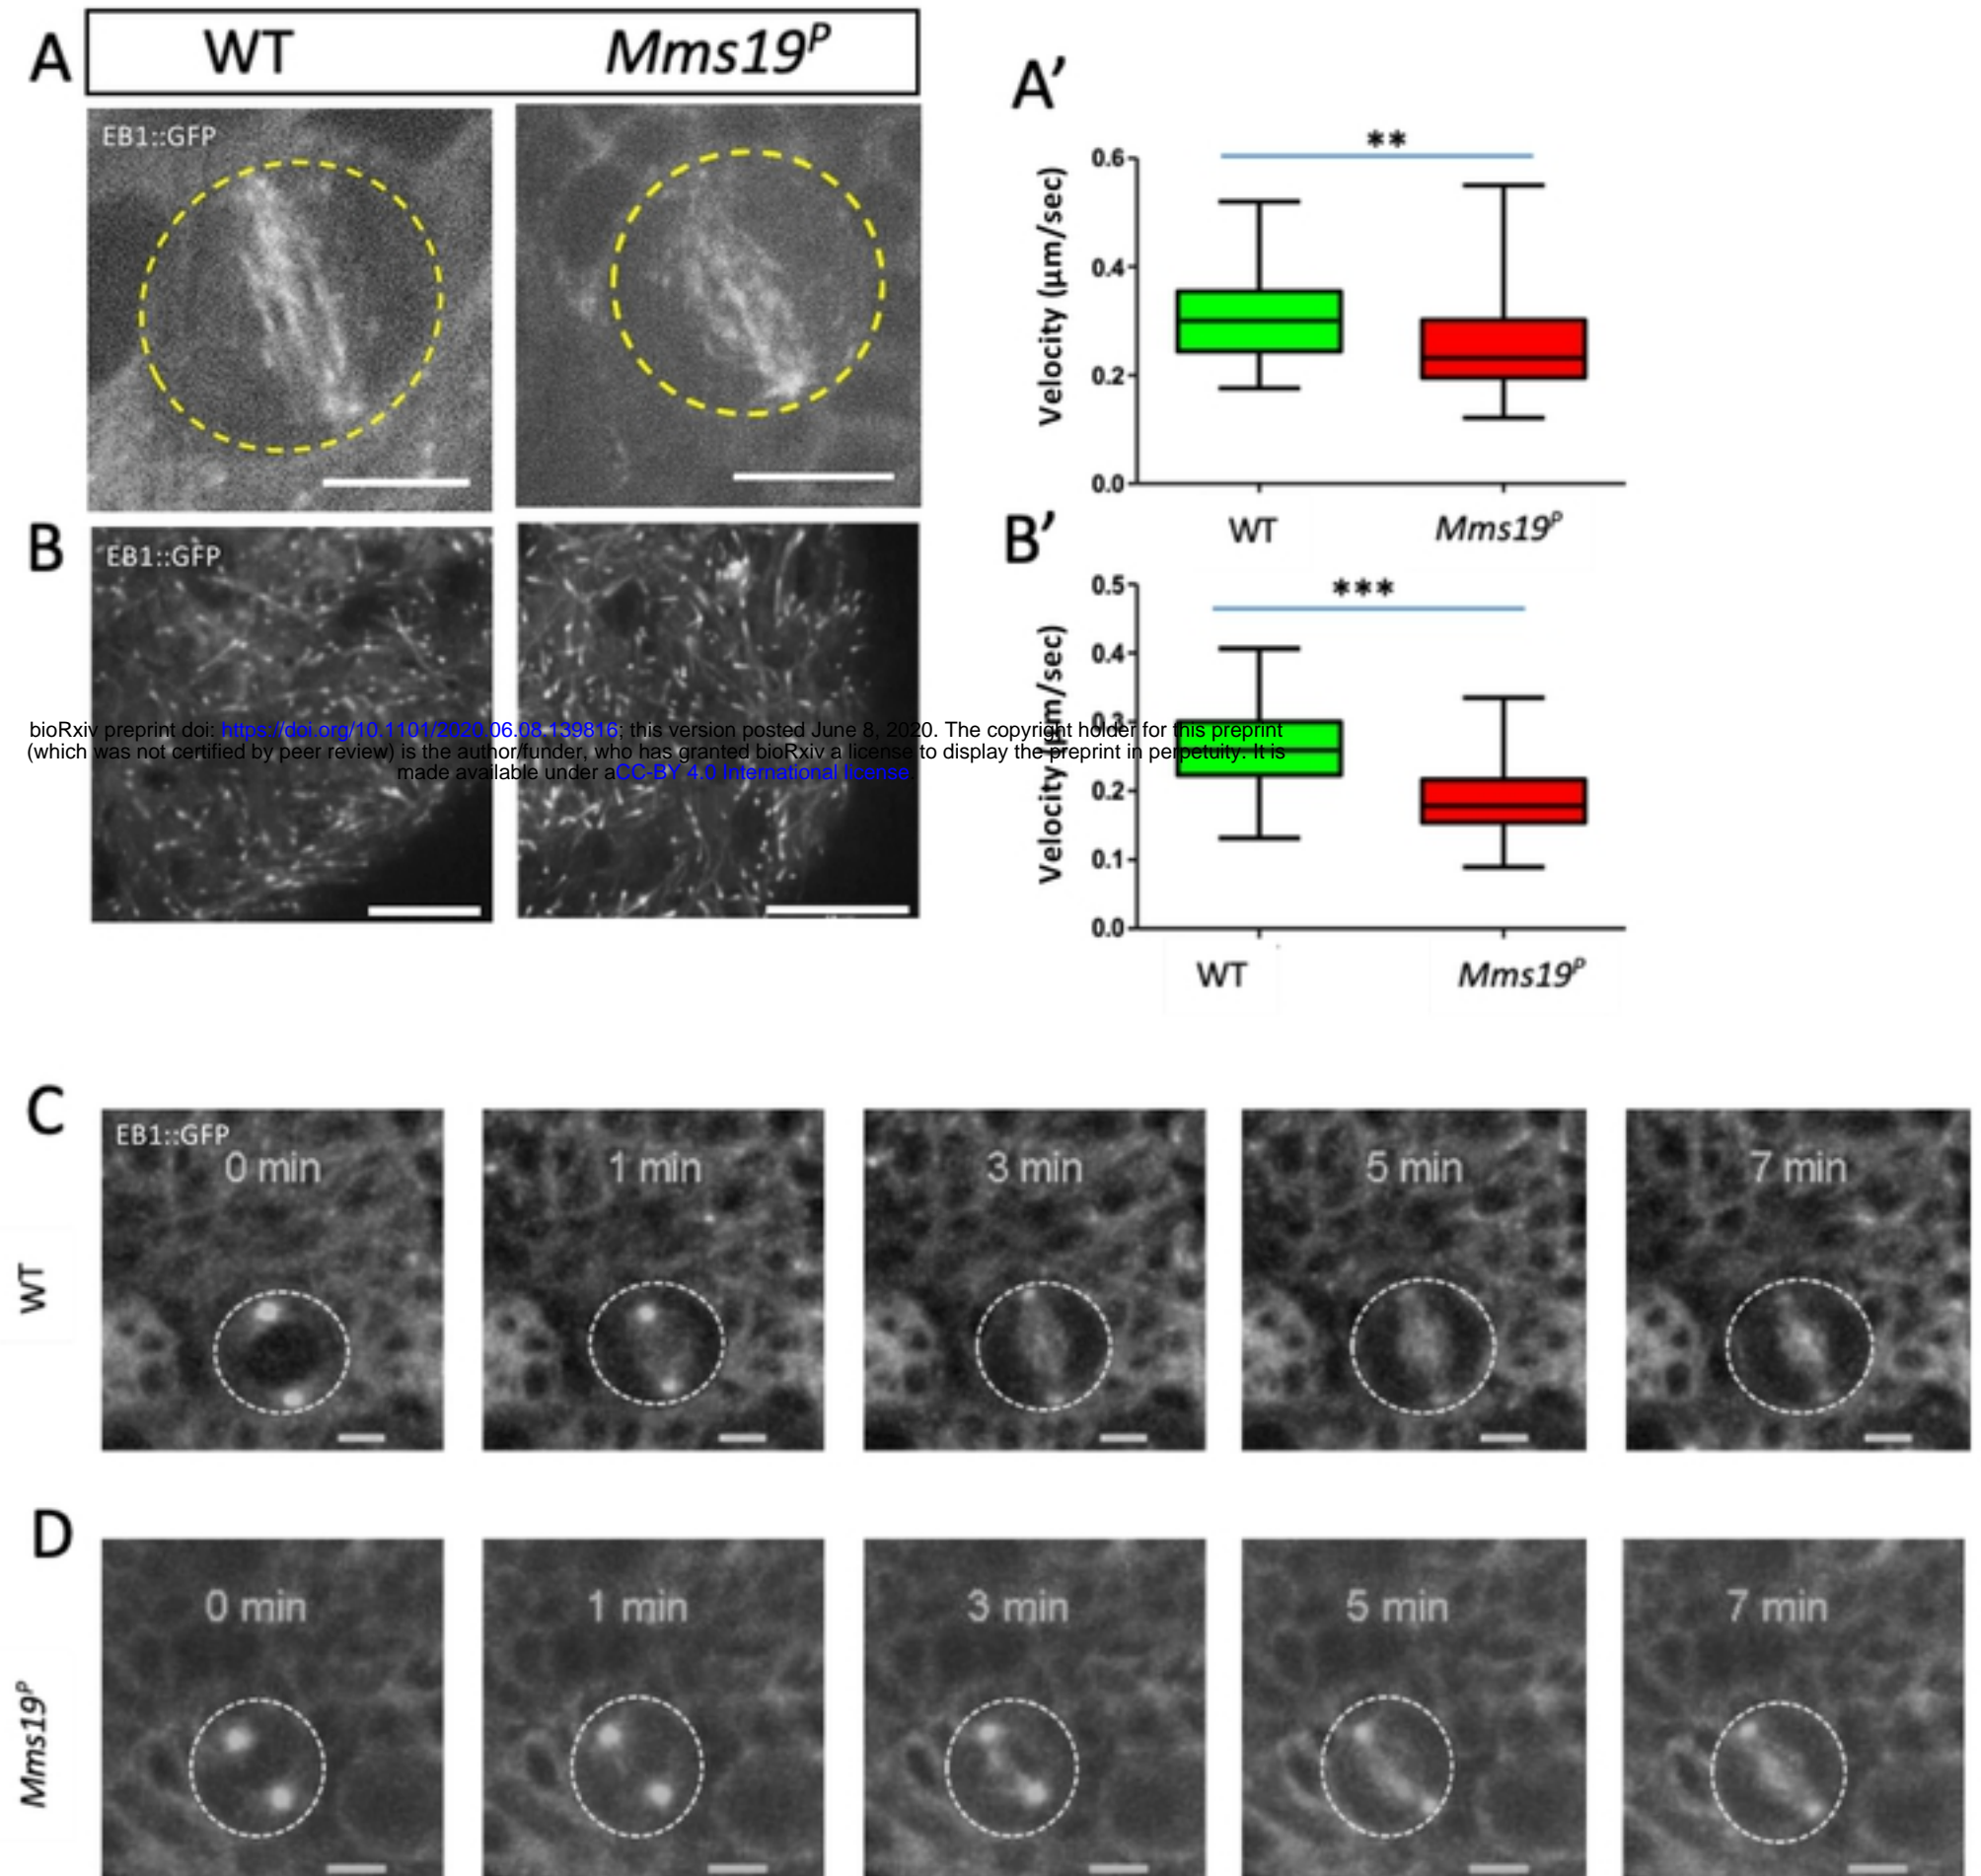

**Figure 5: *Mms19* is required for spindle re-polymerization.**

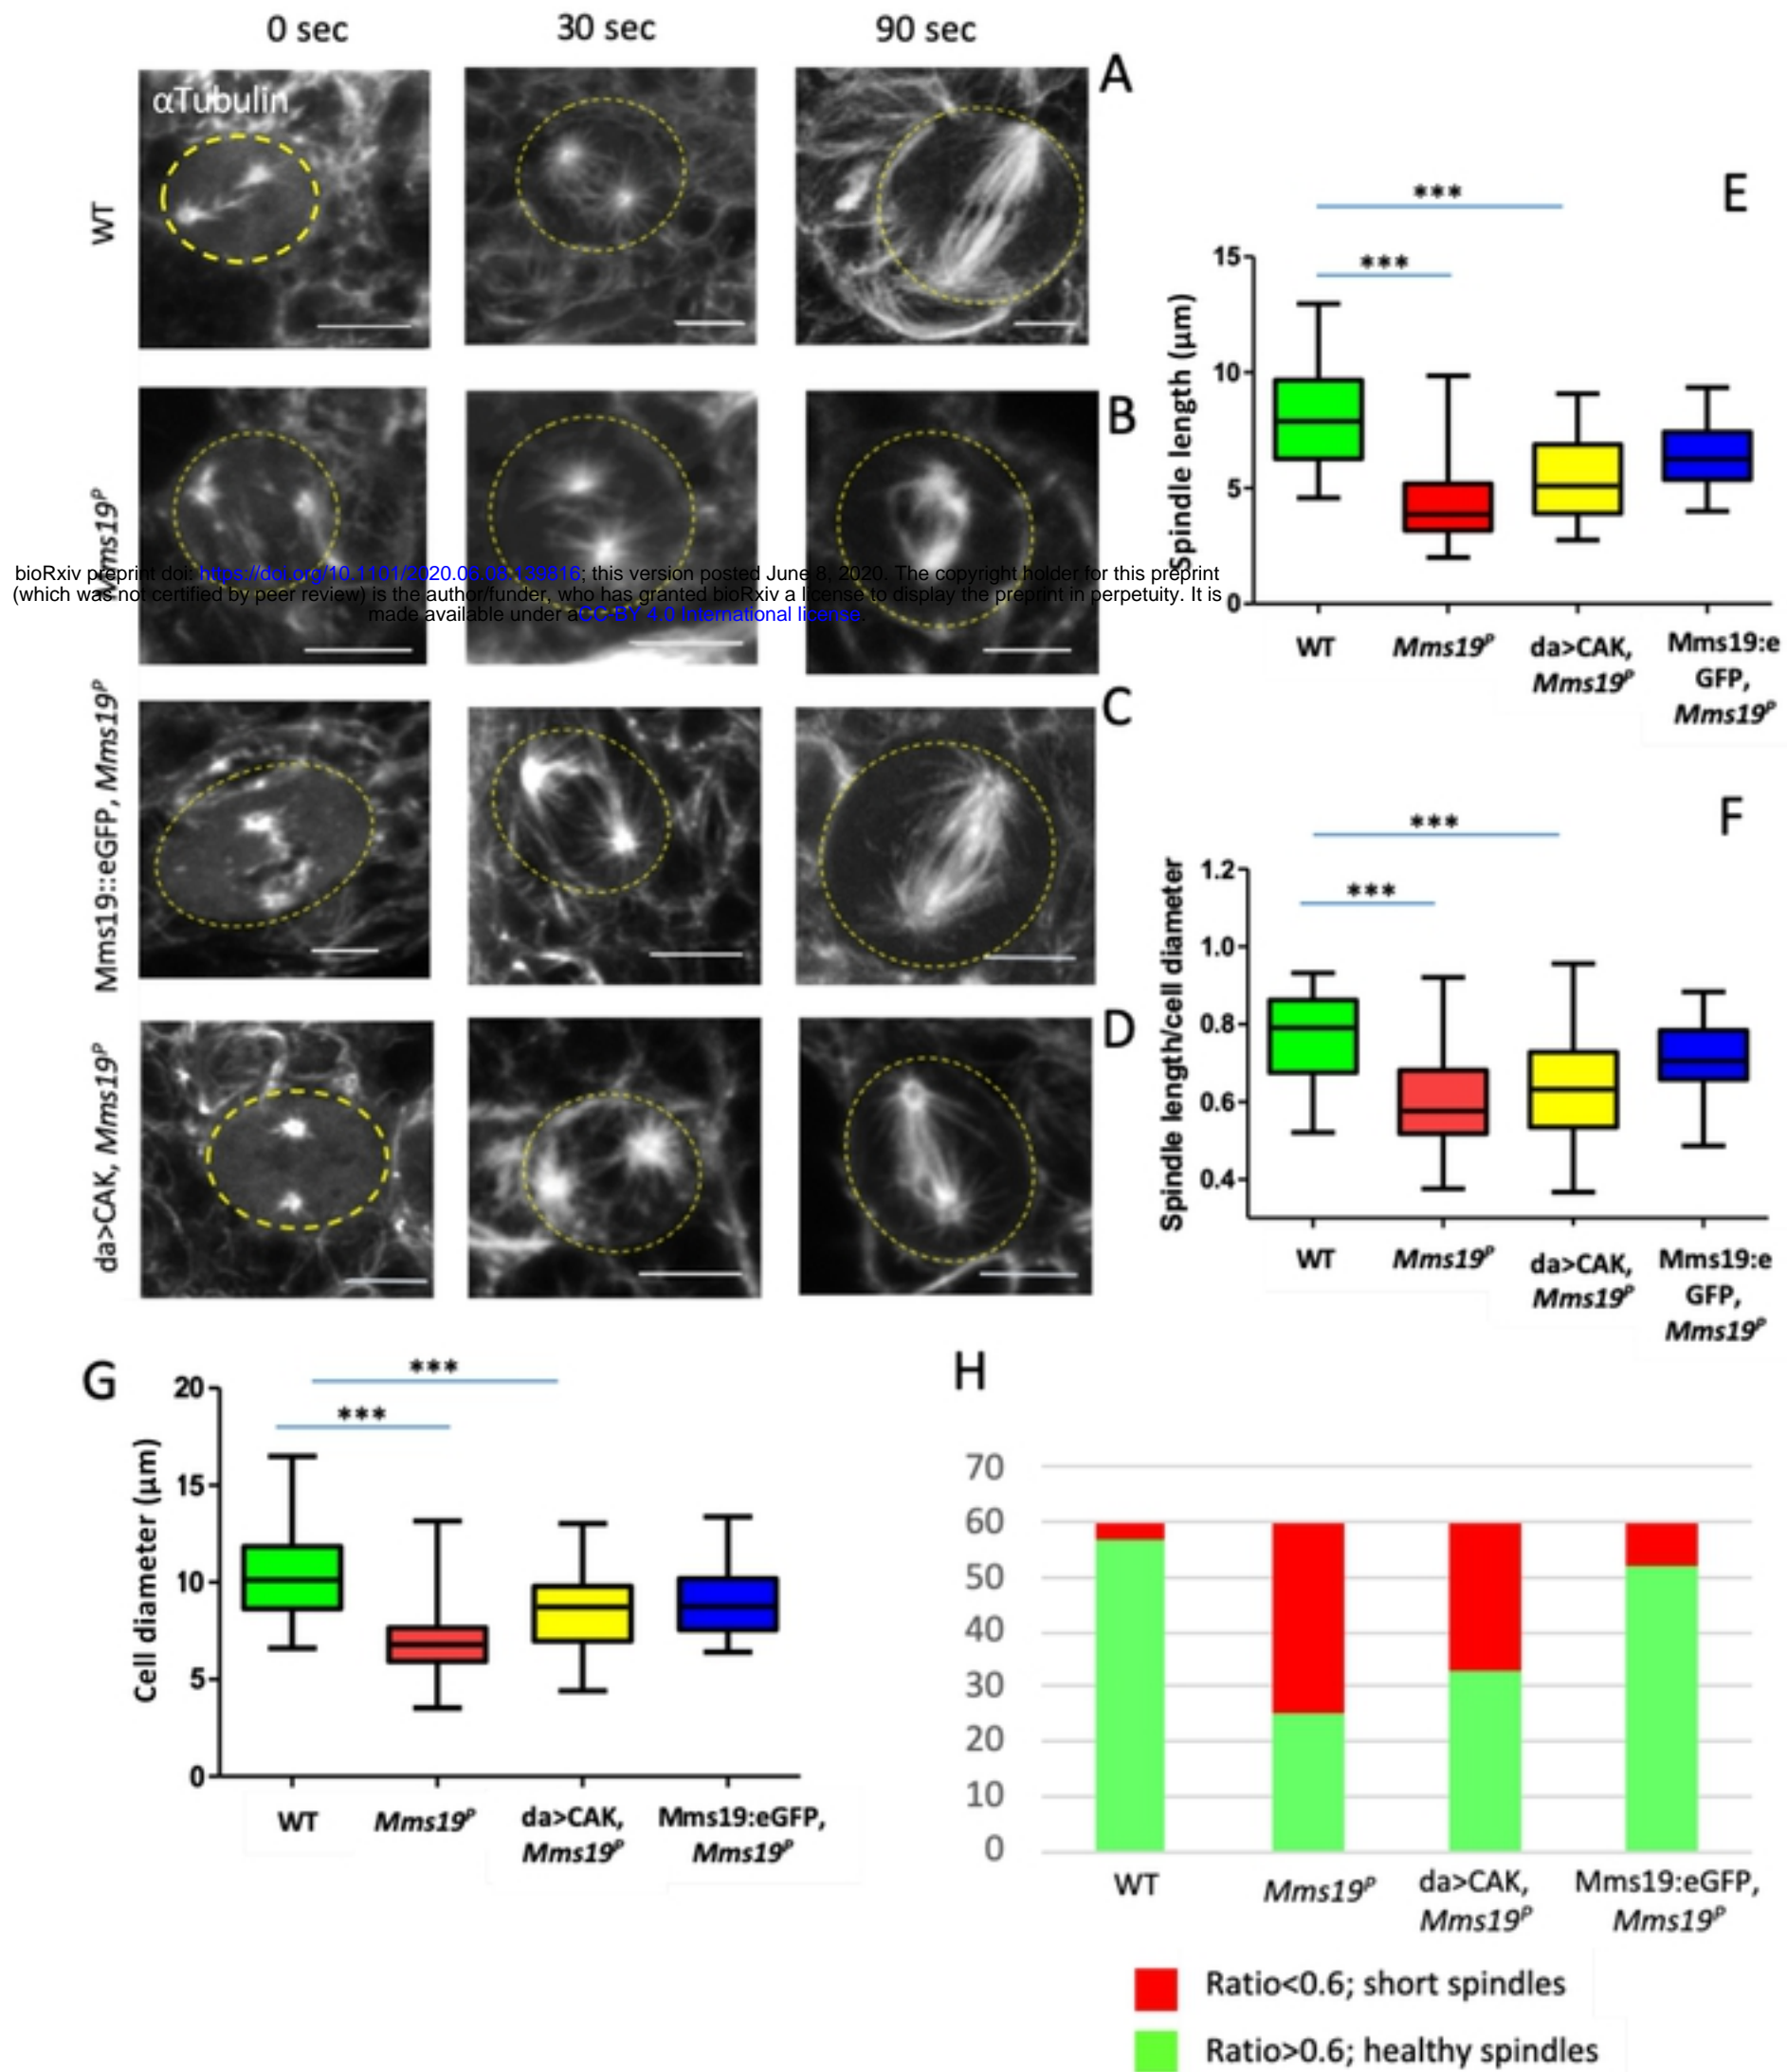

## Figure 2: Neuroblasts depend on *Mms19* for timely and coordinated spindle assembly and spindle orientation

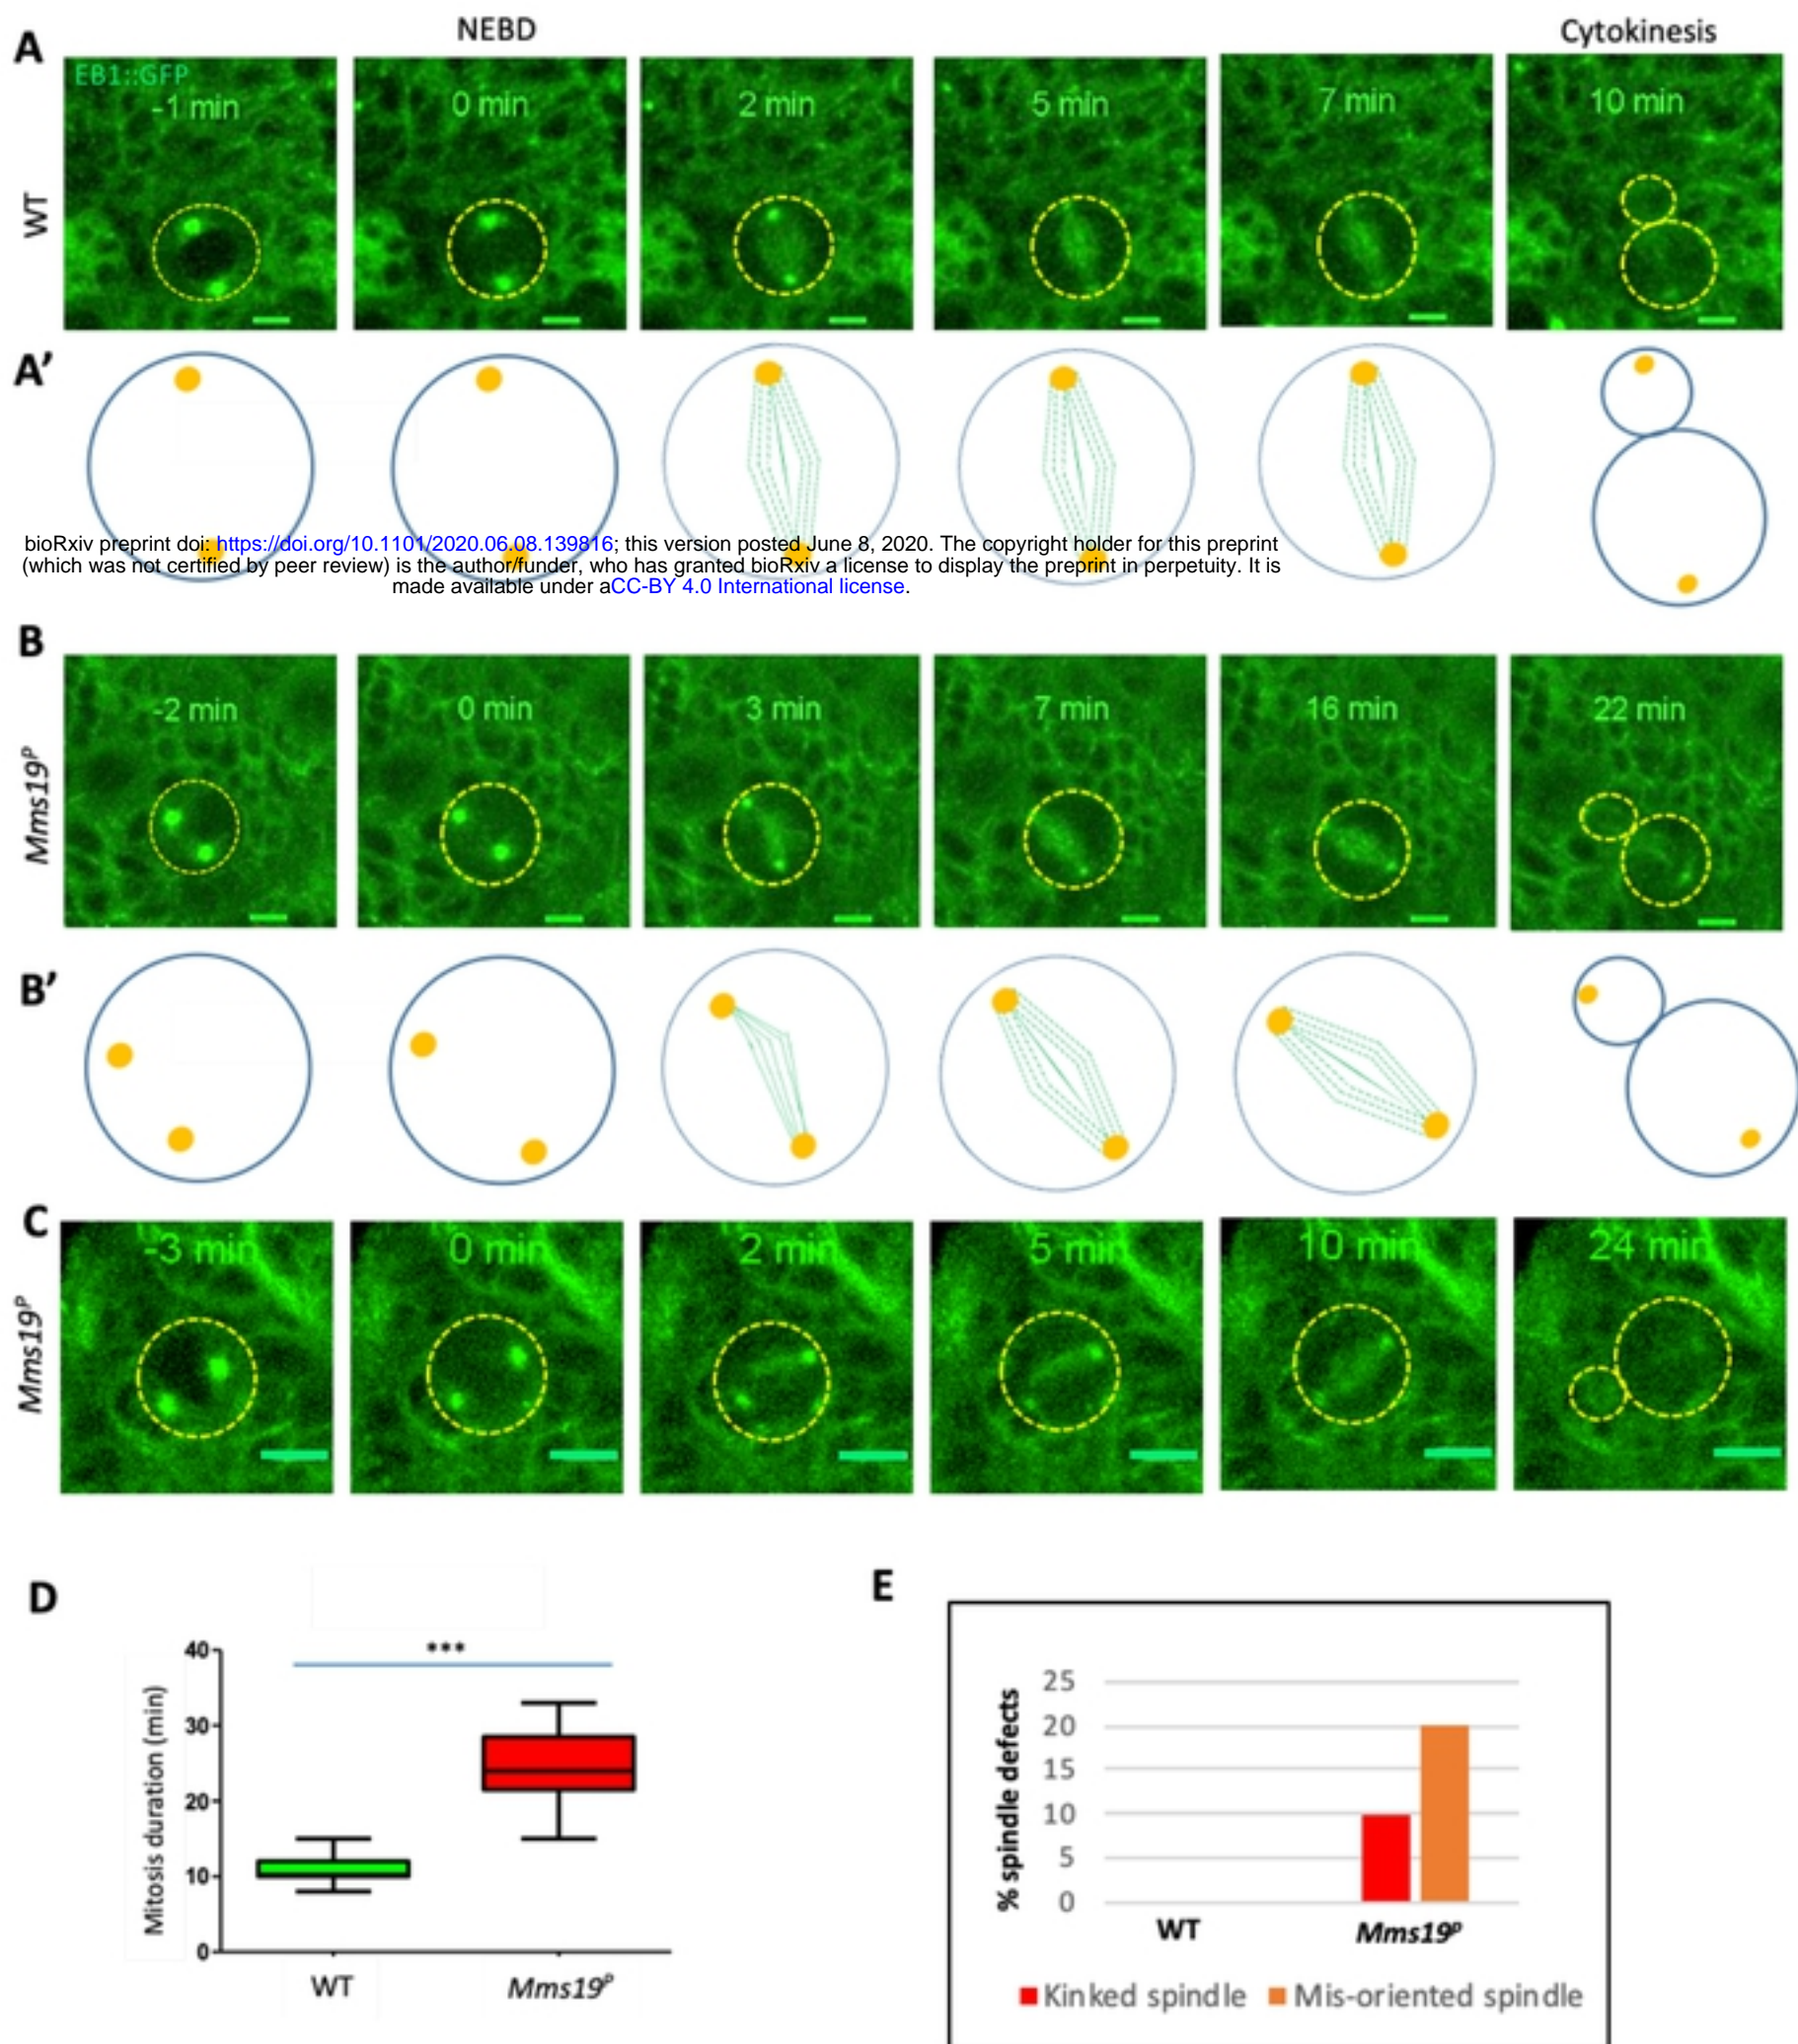

**Figure 3: *Mms19* is required to form a spindle of normal length and density**

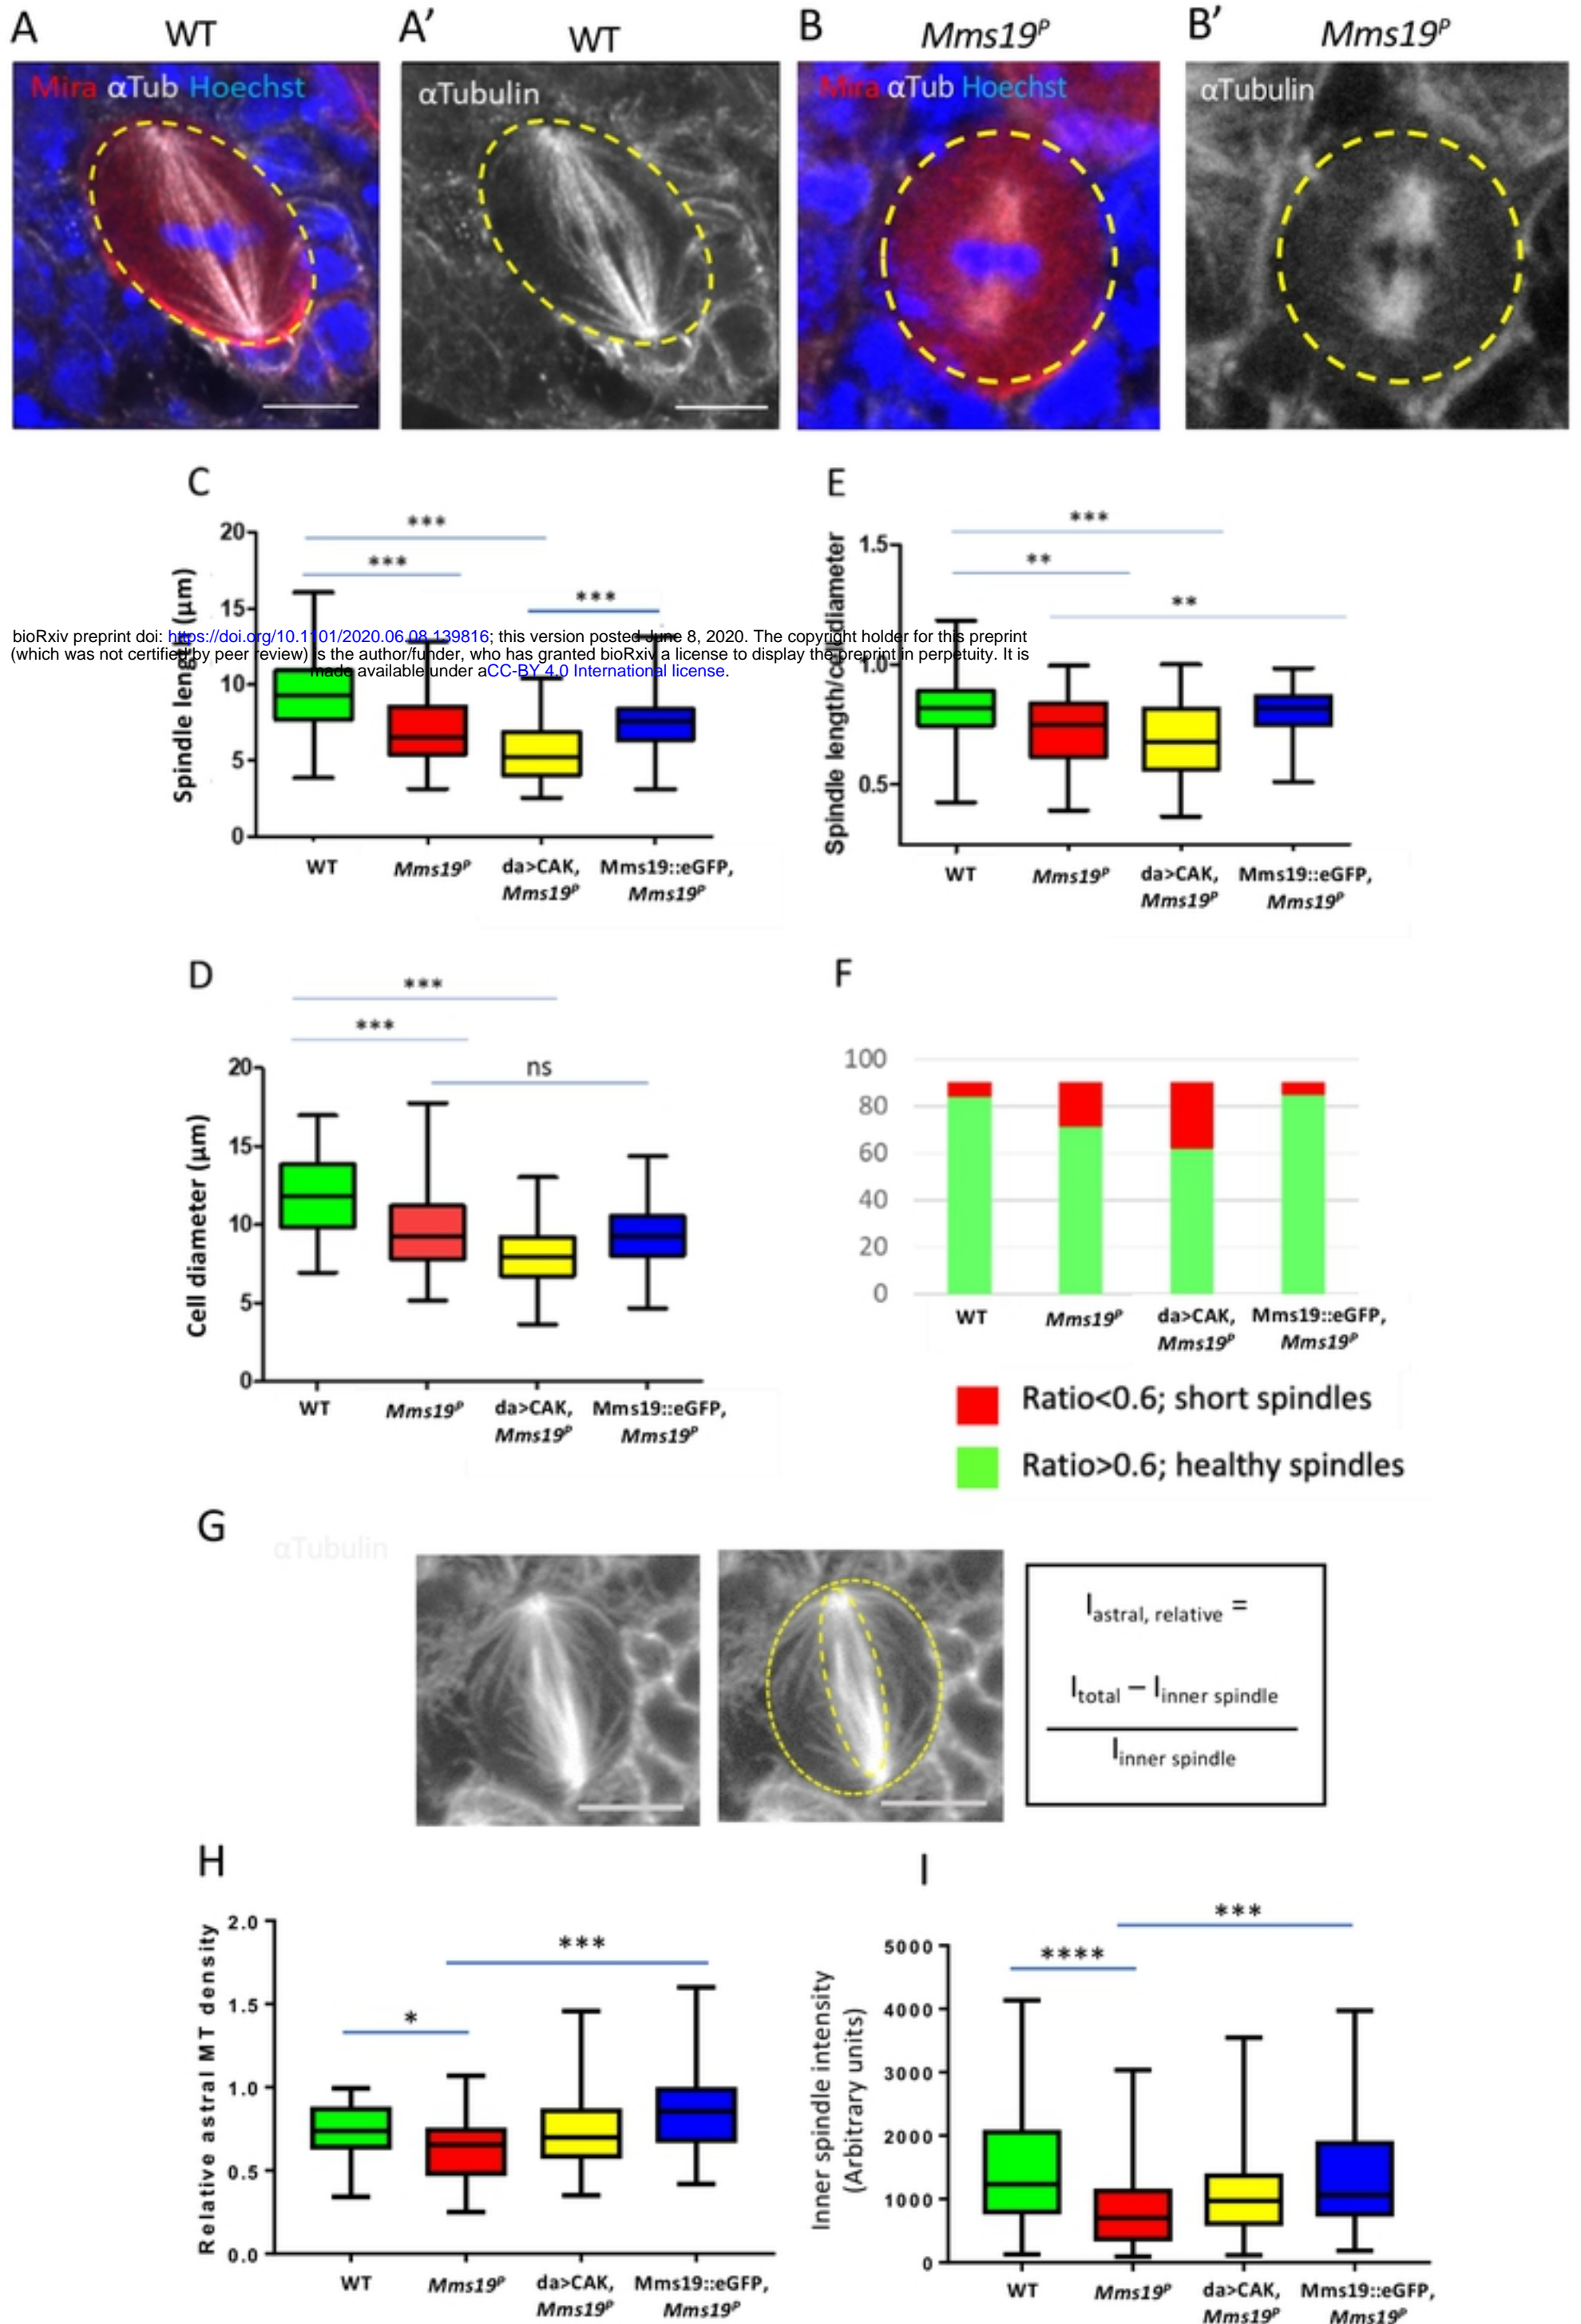

bioRxiv preprint doi: <https://doi.org/10.1101/2020.06.08.139816>; this version posted June 8, 2020. The copyright holder for this preprint (which was not certified by peer review) is the author/funder, who has granted bioRxiv a license to display the preprint in perpetuity. It is made available under aCC-BY 4.0 International license.

# Figure 1: *Mms19<sup>P</sup>* brains show a microcephaly (small brain) phenotype

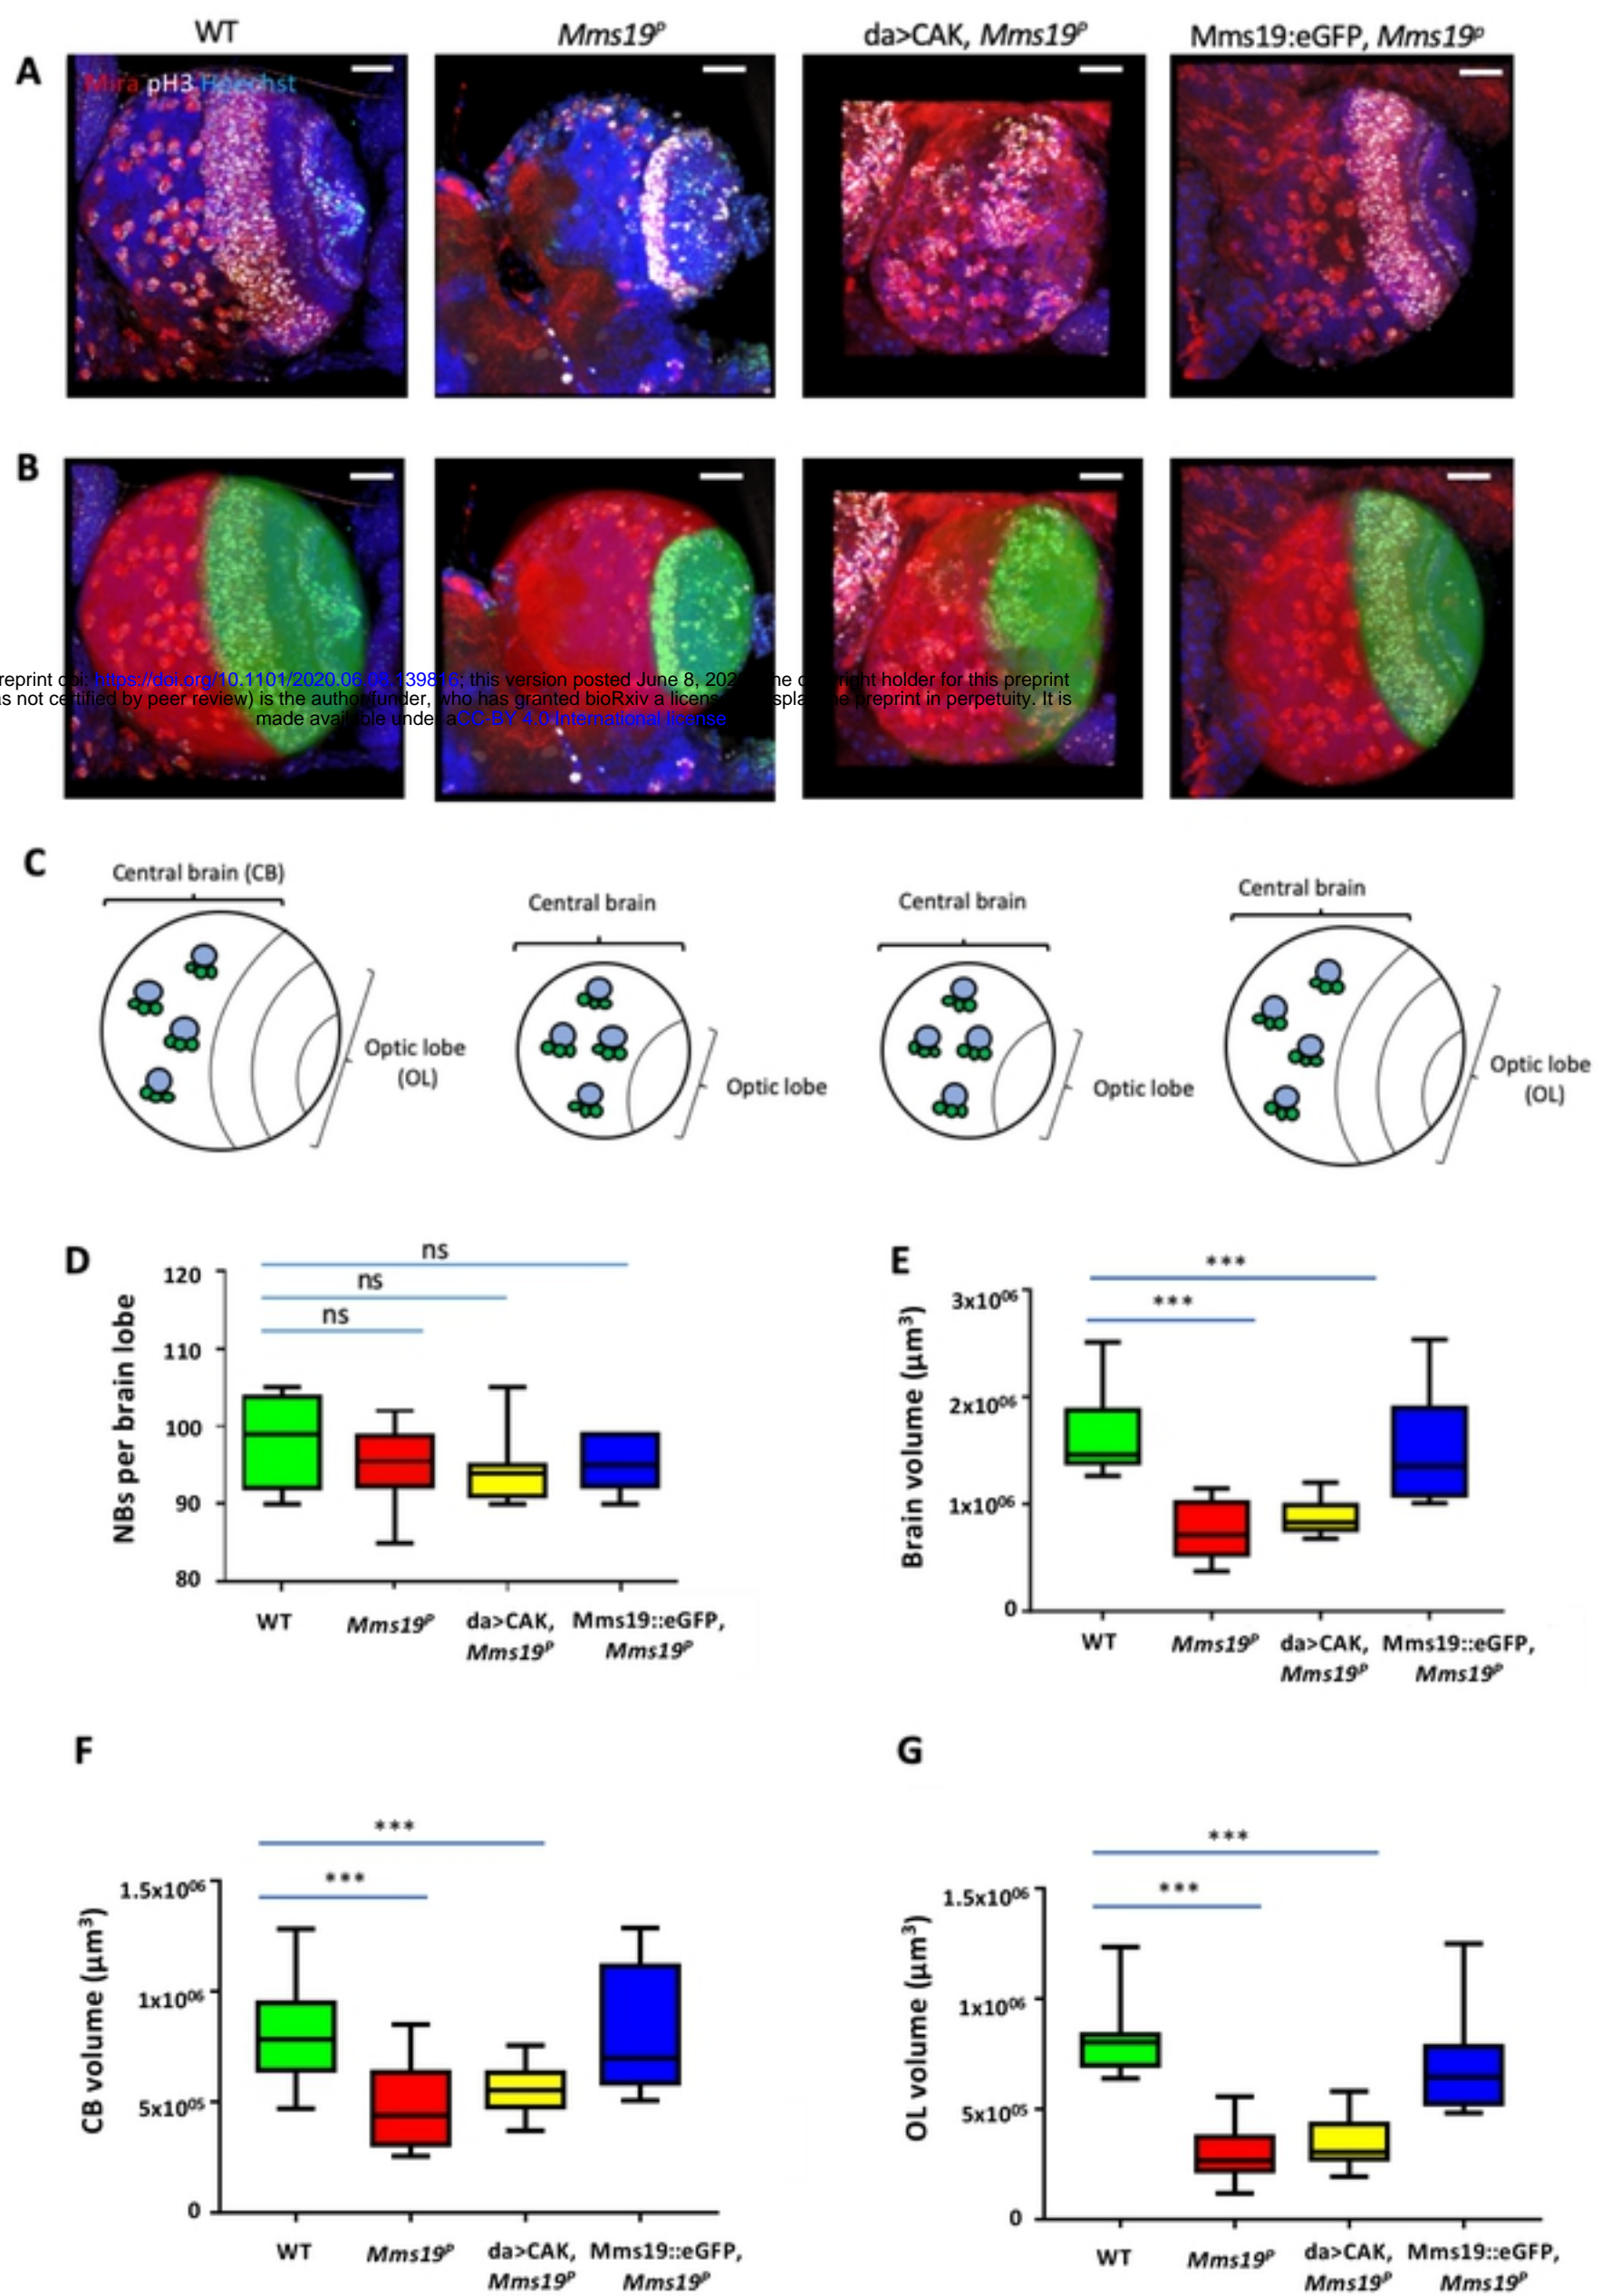

Figure 1
